# Supplementary material
Source: PubMed Central journal article supplement (PMC4153392)
Supplement: NIHMS555422-supplement-1.pdf [file NIHMS555422-supplement-1.pdf]

# Multiplexed 3D Cellular Super-Resolution Imaging with DNA-PAINT and Exchange-PAINT

R. Jungmann, M.S. Avendano, J.B. Woehrstein, M. Dai, W.M. Shih, P. Yin

|                                    |                                                                                                                          |
|------------------------------------|--------------------------------------------------------------------------------------------------------------------------|
| <b>Supplementary Figure 1</b>      | Strand diagrams for DNA origami designs                                                                                  |
| <b>Supplementary Figure 2</b>      | Self-assembly of the microtubule-like DNA origami                                                                        |
| <b>Supplementary Figure 3</b>      | DNA-PAINT super-resolution imaging vs. diffraction-limited imaging of microtubule-like DNA origami structures            |
| <b>Supplementary Figure 4</b>      | Three-color DNA-PAINT super-resolution imaging of microtubule-like DNA origami structures                                |
| <b>Supplementary Figure 5</b>      | Image quantification of an intracellular microtubule network imaged with DNA-PAINT                                       |
| <b>Supplementary Figure 6</b>      | <i>In vitro</i> and <i>in situ</i> Exchange-PAINT setup                                                                  |
| <b>Supplementary Figure 7</b>      | Ten-“color” <i>in vitro</i> Exchange-PAINT super-resolution overview image of DNA origami structures                     |
| <b>Supplementary Figure 8</b>      | Imaging artifacts due to “flipped” or “corrupted” structures                                                             |
| <b>Supplementary Figure 9</b>      | Quantitative comparison of the same targets imaged after ten rounds of Exchange-PAINT                                    |
| <b>Supplementary Figure 10</b>     | Overview image of four-“color” <i>in vitro</i> Exchange-PAINT of digits on single DNA origami structures                 |
| <b>Supplementary Figure 11</b>     | Additional two-color Exchange-PAINT images in fixed HeLa cells                                                           |
| <b>Supplementary Figure 12</b>     | Interactions of imager strands in Exchange-PAINT imaging with cellular components                                        |
| <b>Supplementary Figure 13</b>     | Quantification of sample distortion in Exchange-PAINT imaging                                                            |
| <b>Supplementary Figure 14</b>     | Additional cellular 3D DNA-PAINT image                                                                                   |
| <b>Supplementary Table 1</b>       | Staple sequences for microtubule analog DNA structure                                                                    |
| <b>Supplementary Table 2</b>       | Staple sequences for drift markers                                                                                       |
| <b>Supplementary Table 3 and 4</b> | Staple sequences for DNA origami structures for ten-“color” <i>in vitro</i> Exchange-PAINT demonstration (digits 0 to 9) |
| <b>Supplementary Table 5</b>       | Staple sequences for DNA origami structures for <i>in vitro</i> Exchange-PAINT demonstration (digits 0 to 3)             |
| <b>Supplementary Table 6</b>       | p8064 scaffold sequence for microtubule-like DNA origami structure                                                       |
| <b>Supplementary Table 7</b>       | M13mp18 scaffold sequence for drift markers and Exchange-PAINT DNA origami structures                                    |
| <b>Supplementary Table 8</b>       | DNA-PAINT docking and imager sequences and biotin docking sequence                                                       |
| <b>Supplementary Protocol</b>      | Flow chamber protocol for Exchange-PAINT imaging                                                                         |

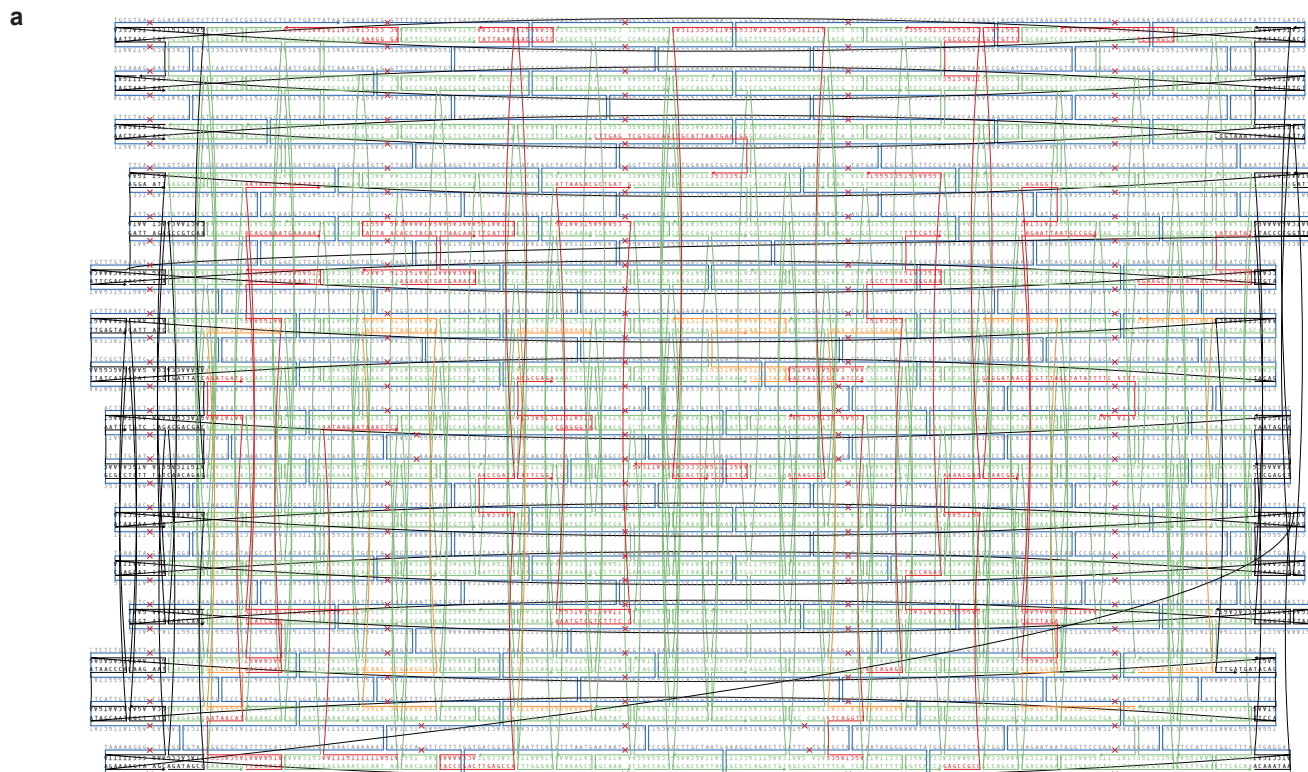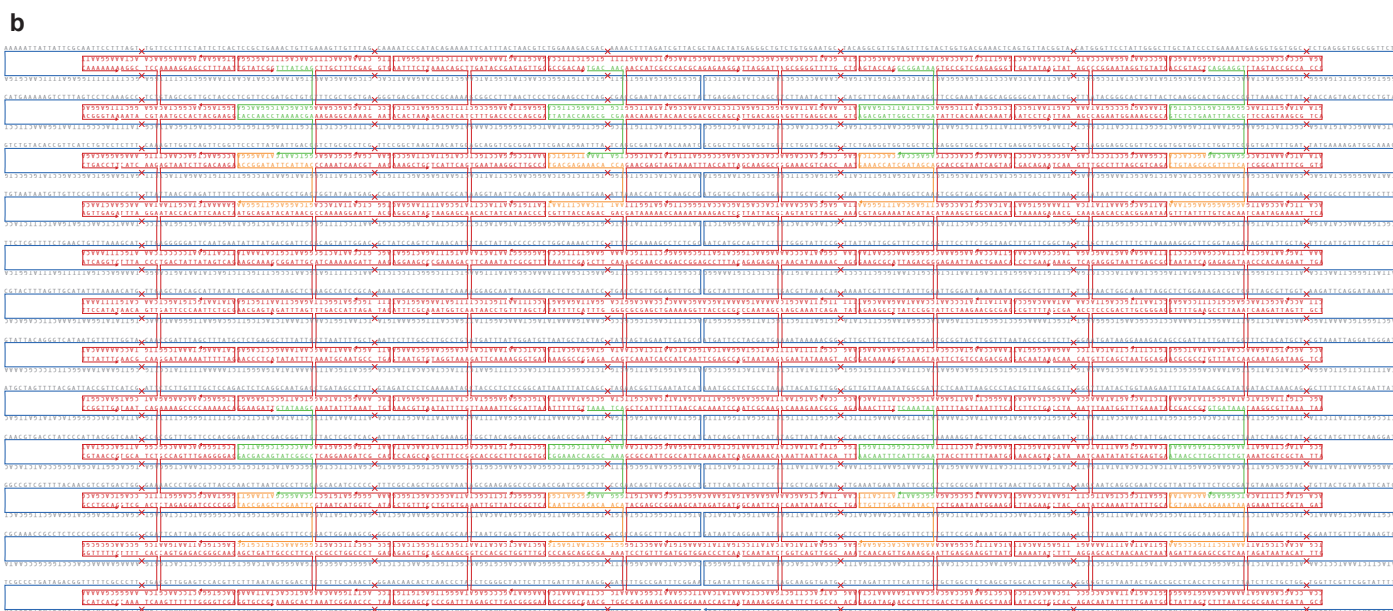

**Supplementary Figure 1 | Strand diagrams for DNA origami designs.** Strands are colored to denote strands extensions (see Supplementary Tables S1 and S2). Color code: Green: structure strands; Red: DNA-PAIN docking sites; Orange: Biotin docking or biotinylated strands; Black: connector strands for polymerization. **(a)** Microtubule-like DNA origami structure. **(b)** Single-layer DNA origami structure used as drift marker for super-resolution microscopy. Zoom in for details.

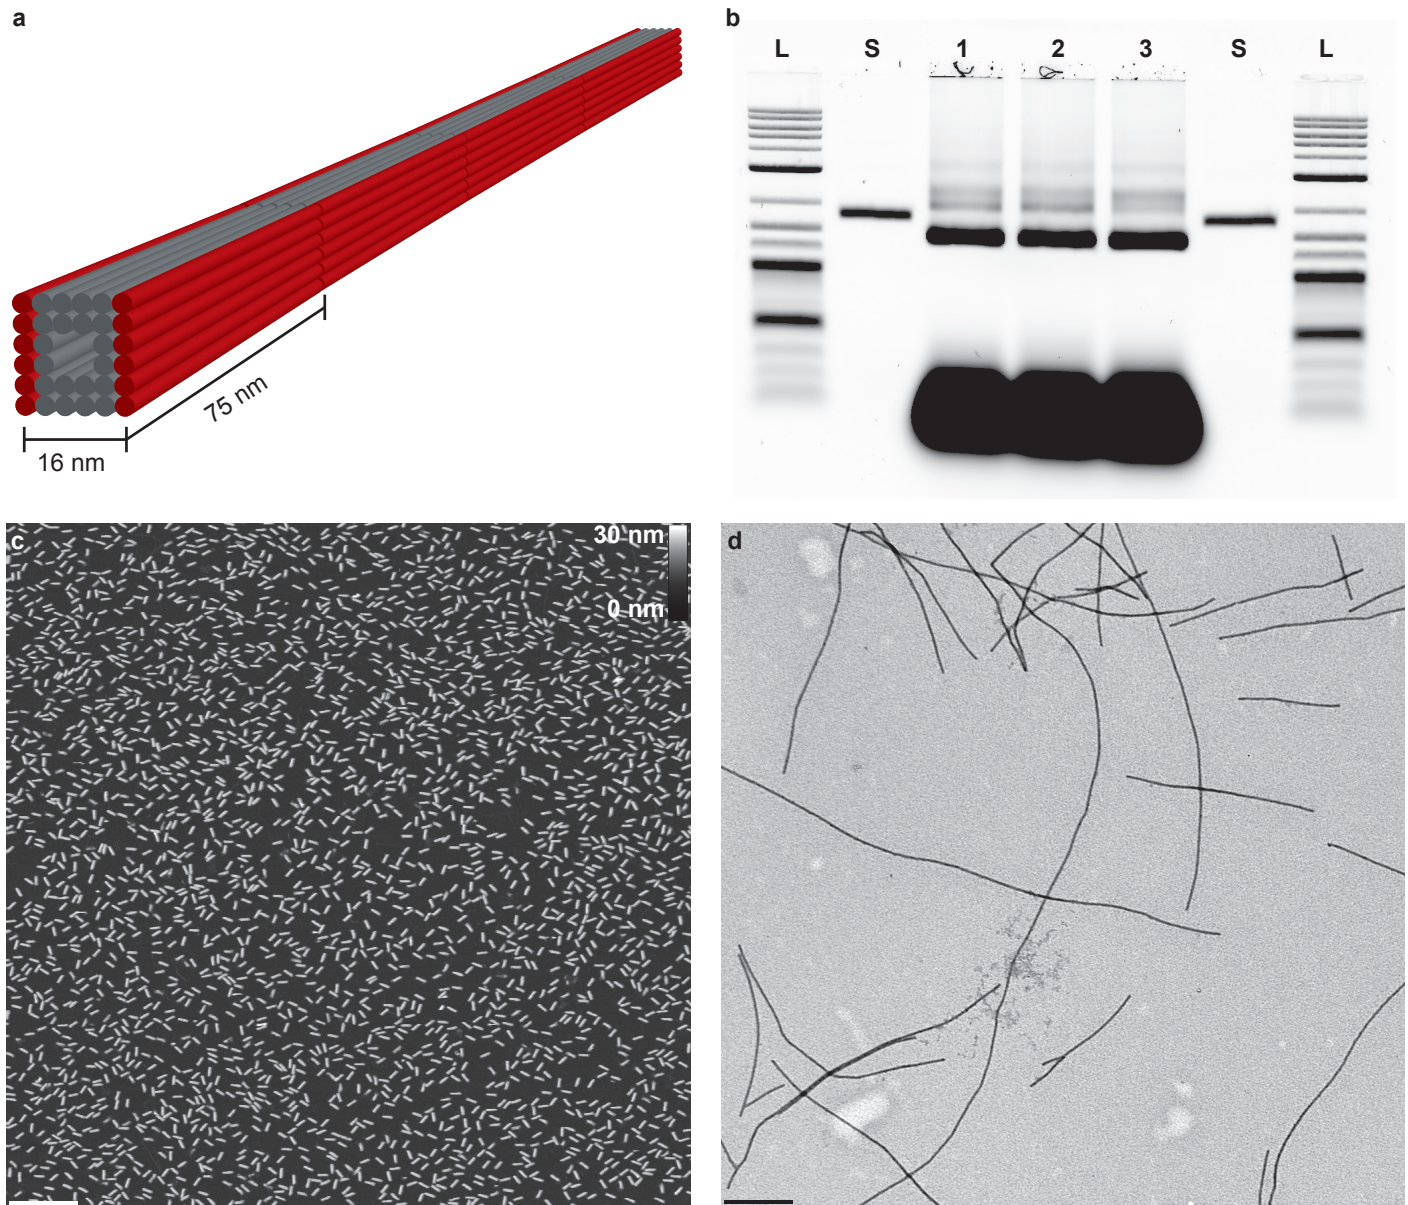

**Supplementary Figure 2 | Self-assembly of the microtubule-like DNA origami.** (a) Origami design schematic. Origami monomers are double helices arranged in a 6x6 square grid with a 2x2 void in the center (shown is an oligomer containing 4 monomer structures). (b) Agarose formation gel demonstrating self-assembly of origami monomers. Lanes: 2-log DNA ladder (lane L), p8064 scaffold (lane S), DNA origami monomers with docking sequences for red, green, and blue DNA-PAINT imager strands, respectively (lanes 1, 2, and 3). (c) AFM image of monomeric structures after purification [scale bar: 500 nm]. (d) TEM image of microtubule-like DNA origami structures post polymerization [scale bar: 500 nm].

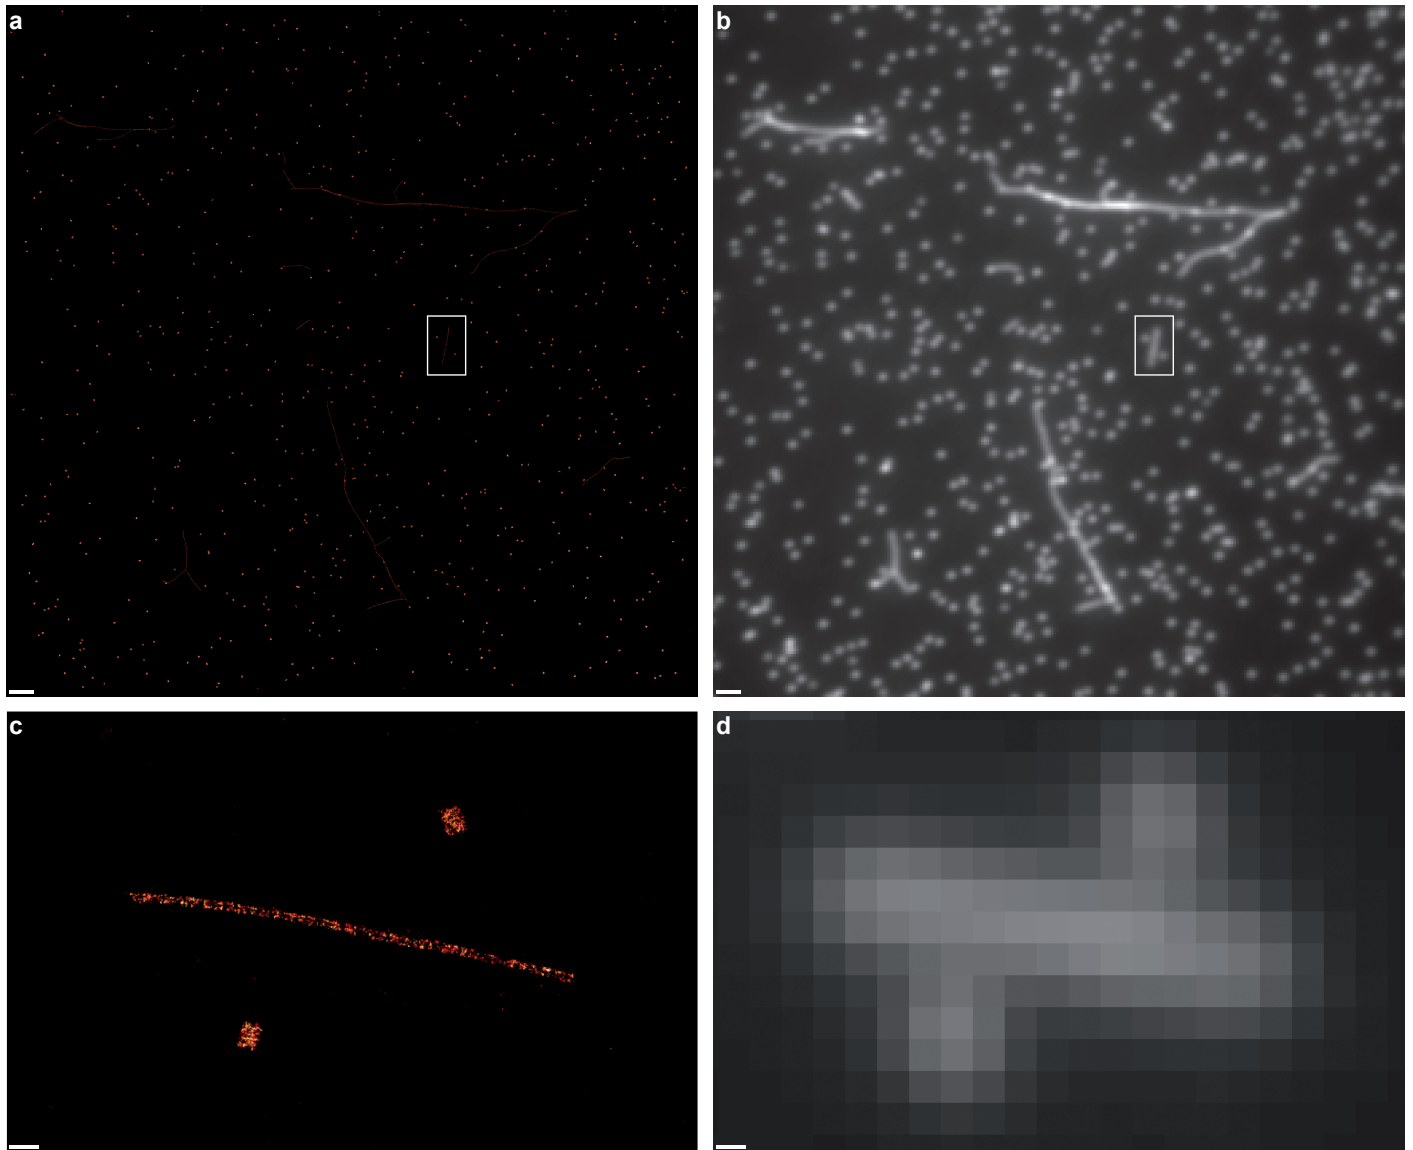

**Supplementary Figure 3 | DNA-PAINT super-resolution imaging vs. diffraction-limited imaging of microtubule-like DNA origami structures.** (a) DNA-PAINT super-resolution image of microtubule-like DNA origami polymers (filamentous structures) and DNA origami drift markers (point-like particles), both labeled with 10 nt DNA-PAINT docking sites [scale bar: 1  $\mu\text{m}$ ]. (b) Diffraction-limited representation of the same region as in a. Here, the diffraction-limited image is obtained by averaging all frames from the time-lapse movie [scale bar: 1  $\mu\text{m}$ ]. (c) Zoom-in of the highlighted area in a [scale bar: 100 nm]. (d) Diffraction-limited representation of the region in c [scale bar: 100 nm]. Imaging conditions: 1.5 nM Cy3b-labeled imager strands in buffer B. 15,000 frames, 5 Hz frame rate. Excitation power density: 294  $\text{W}/\text{cm}^2$  at 561 nm. Zoom in for details.

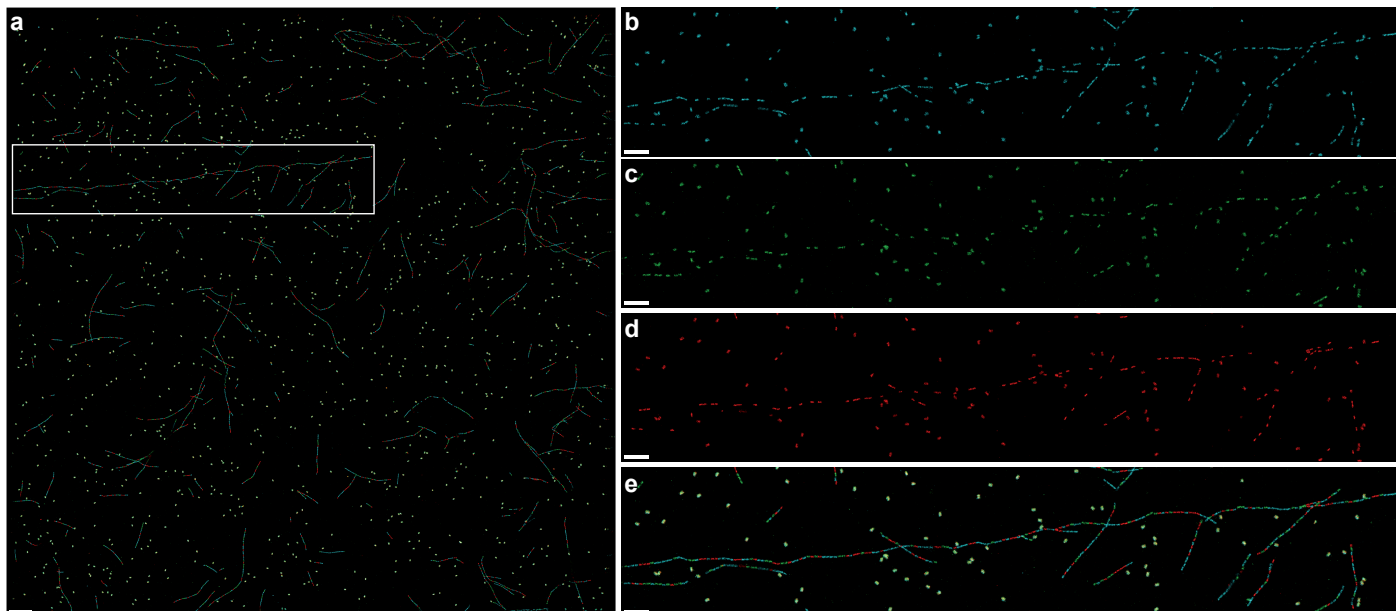

**Supplementary Figure 4 | Three-color DNA-PAINT super-resolution imaging of microtubule-like DNA origami structures.** (a) Three-color DNA-PAINT super-resolution image of microtubule-like DNA origami (filamentous structures) and DNA origami drift markers (point-like objects). Microtubule-like structures are hetero-polymers containing monomers carrying 9 nt DNA-PAINT docking sites for ATTO488-, Cy3b-, and ATTO655-labeled DNA-PAINT imager strands, respectively. The incorporation of each monomer is stochastic, thus yielding a random pattern of “red”, “green” or “blue” segments in the polymerized structure [scale bar: 1  $\mu\text{m}$ ]. (b–e) Zoom-in of the highlighted area in a [scale bars: 500 nm]. (b–d) For the indicated area in a, ATTO488, Cy3b, and ATTO655 channels are shown, respectively. These single channel images highlight the fact that there is no crosstalk in multiplexed DNA-PAINT super-resolution images, due to orthogonality of DNA-PAINT sequences. (e) Superimposed image from b–d. Imaging conditions: ATTO488-, Cy3b- and ATTO655-labeled imager strands, 1 nM each in buffer B. All imager strands were present throughout imaging, which was performed sequentially in the red, green, and blue channels. 15,000 frames each color, 2.5 Hz frame rate. Excitation power densities: 283  $\text{W}/\text{cm}^2$  at 647 nm, 62  $\text{W}/\text{cm}^2$  at 561 nm and 55  $\text{W}/\text{cm}^2$  at 488 nm. Zoom in for details.

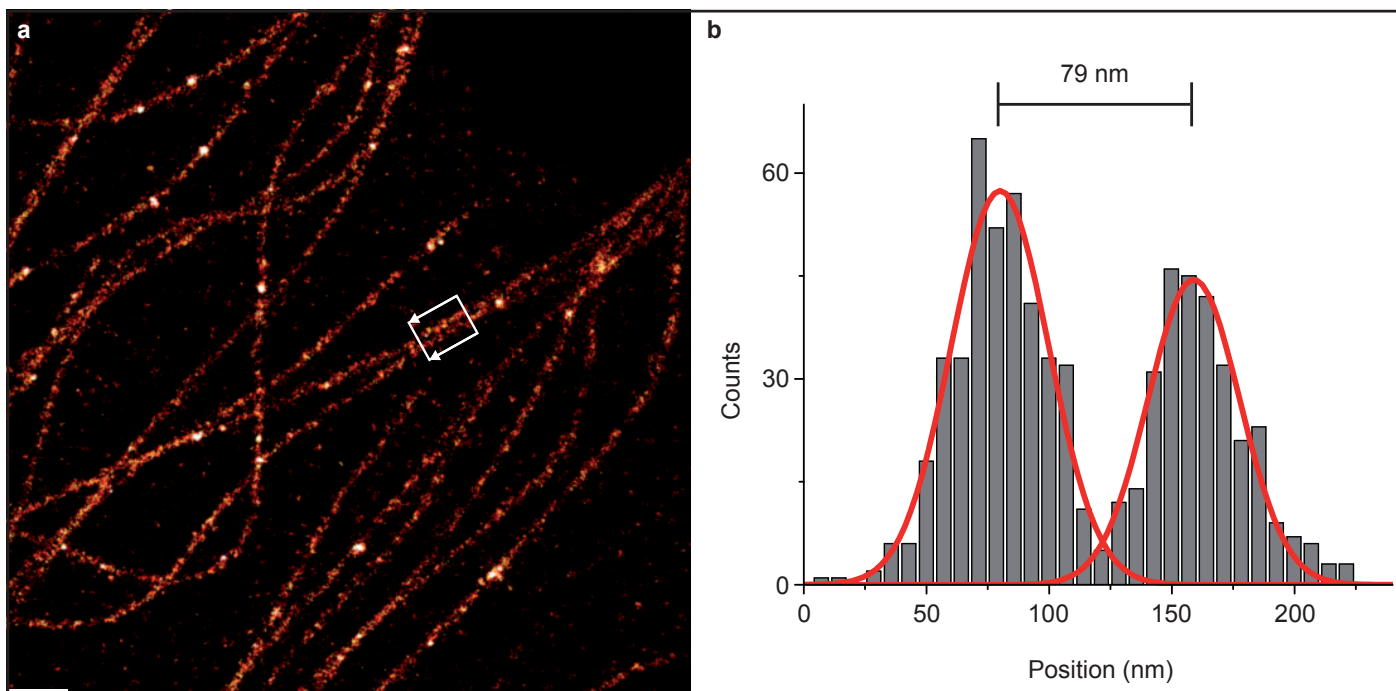

**Supplementary Figure 5 | Image quantification of an intracellular microtubule network imaged with DNA-PAINT.** (a) Zoom-in of image in Fig. 2b, where the region of analysis is indicated by a white box. The higher magnification image highlights the specific binding of imager strands to the Antibody-DNA conjugates on the microtubules with very little non-specific binding in the surrounding cellular environment [scale bar: 500 nm]. (b) Cross-sectional histogram (arrows denote histogram direction) of the highlighted area in a yields an apparent width of the two microtubules of  $\approx 47$  and  $\approx 44$  nm, respectively. The distance of the two microtubules is  $\approx 79$  nm, well below the diffraction limit. Imaging conditions: 700 pM ATTO655-labeled imager strands in buffer C, 10,000 frames, 10 Hz frame rate. Excitation power density: 283  $\text{W}/\text{cm}^2$  at 647 nm.

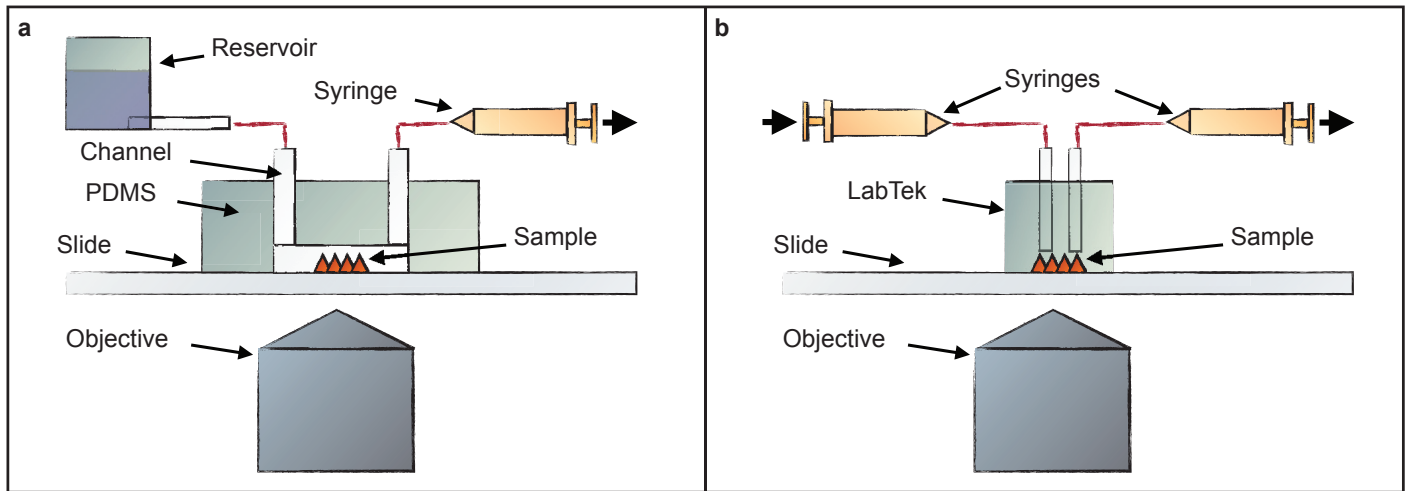

**Supplementary Figure 6 | *In vitro* and *in situ* Exchange-PAINT setup.** (a) Experimental setup used for *in vitro* DNA origami experiments. The sample is immobilized on a glass coverslip in a PDMS channel. Imaging and washing buffers are added to a reservoir and pulled through the channel by a syringe. Reservoirs and syringes are connected to the PDMS channel via flexible tubing and are thus mechanically decoupled. (b) Experimental setup used for *in situ* cell imaging. Cells are imaged in a Lab-Tek II chamber. One syringe supplies new buffer solution, the second one removes the previous buffer.

Different fluidic setups are used for *in vitro* and *in situ* imaging, as cells are grown in Lab-Tek II chambers for the *in situ* case. The PDMS chamber used in the *in vitro* experiments has the advantage of requiring less fluid volumes for buffer and imaging solution exchange.

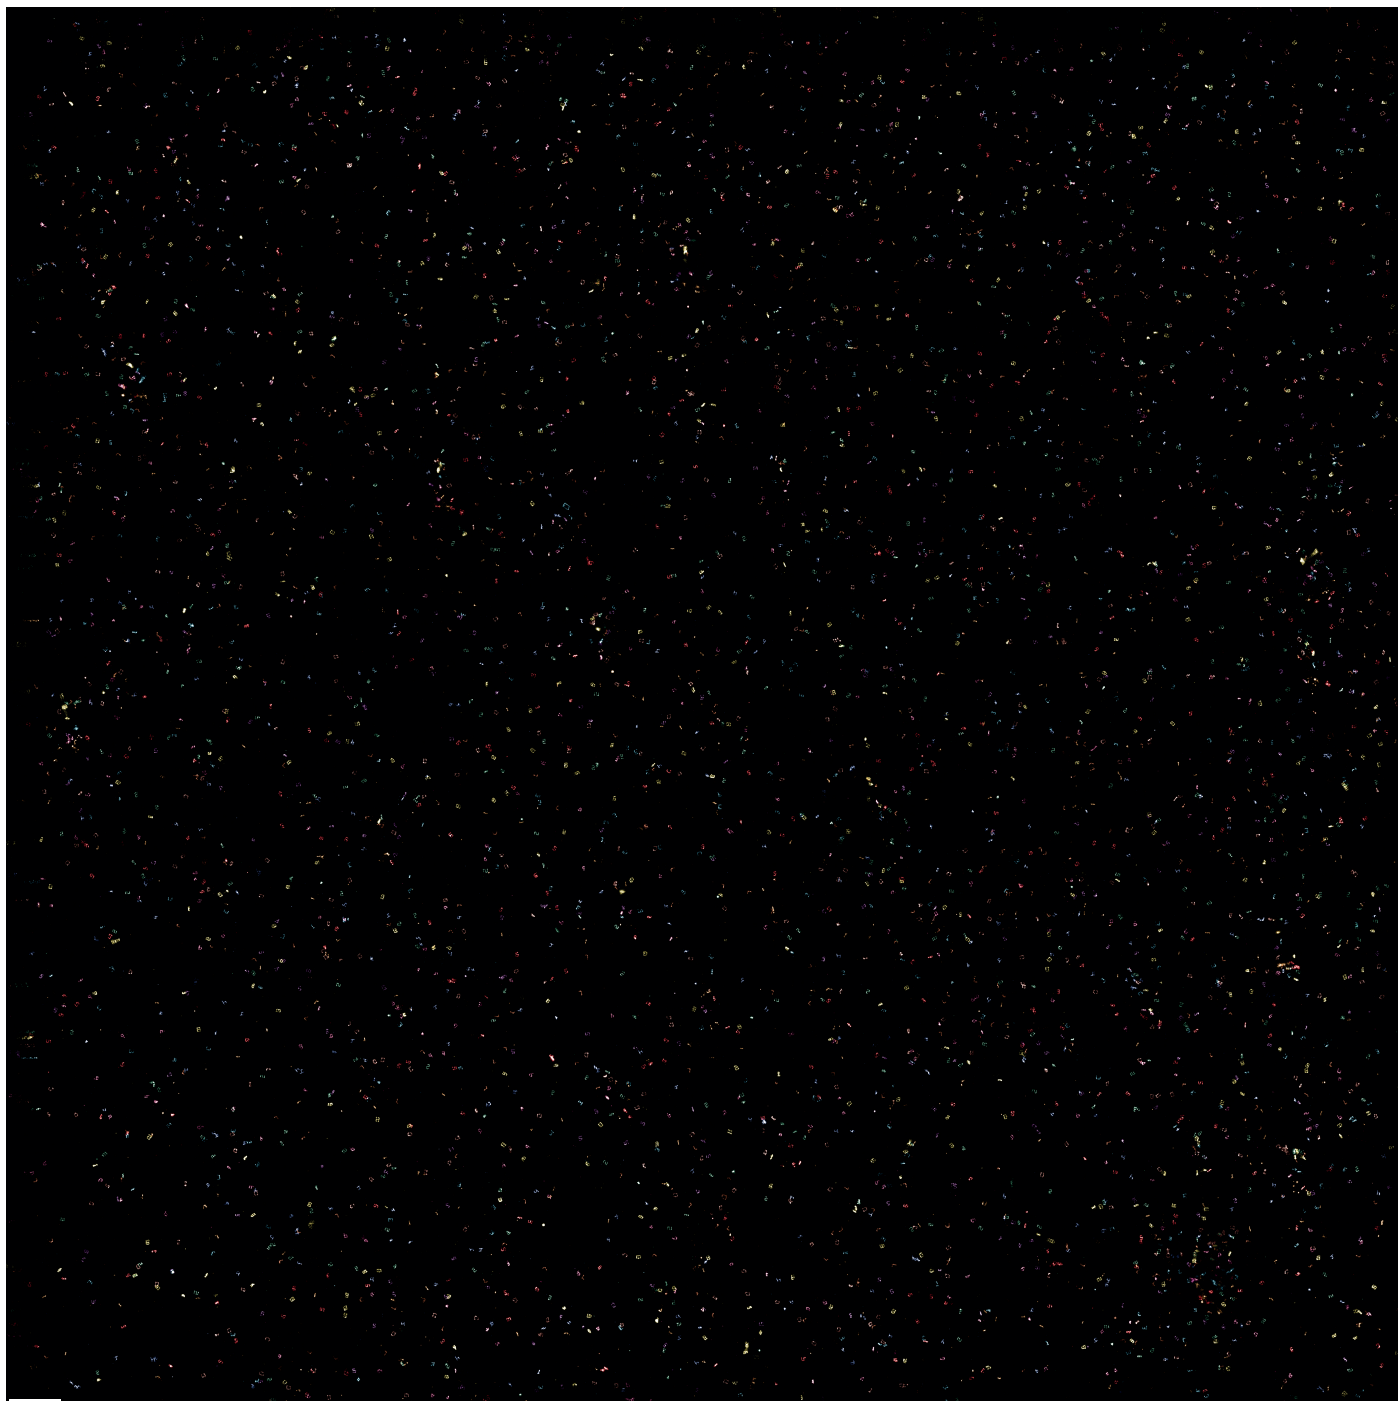

**Supplementary Figure 7 | Ten-“color” *in vitro* Exchange-PAINT super-resolution overview image of DNA origami structures.** Large field of view of the same image as in **Fig. 3d** [scale bar: 1  $\mu\text{m}$ ]. Imaging conditions for each Exchange-PAINT round: 7,500 frames, 5 Hz frame rate. Excitation power density: 166  $\text{W}/\text{cm}^2$  at 561 nm. Zoom in for details.

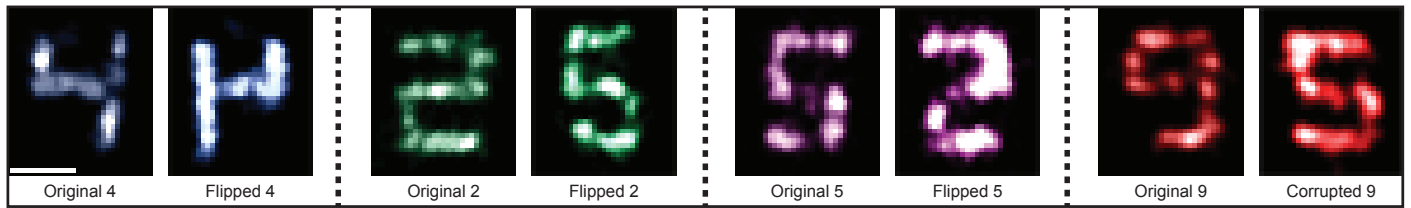

**Supplementary Figure 8 | Imaging artifacts due to “flipped” or “corrupted” structures.** DNA origami can be accidentally immobilized upside down. Thus, a mirrored digit can be imaged. This results e.g. in a digit 2 appearing as a digit 5 and vice versa. However, due to the specific appearance of the digit in only one imaging round, identification is nevertheless possible. Furthermore, incorporation efficiency of strands in DNA origami structures is not 100 %. DNA-PAINT docking sites can be missing stochastically in every structure. These “local defects” or missing points can alter the displayed digit, e.g. a digit 9 may appear as a digit 5. Again, specific detection in only one Exchange-PAINT cycle allows unambiguous identification. [Scale bar: 50 nm].

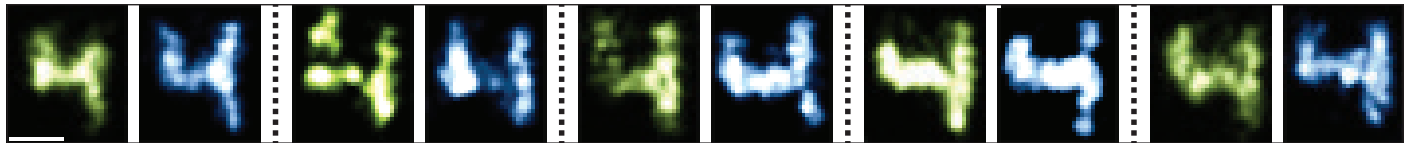

**Supplementary Figure 9 | Quantitative comparison of the same targets imaged after ten rounds of Exchange-PAINT.** Origami structures displaying docking strands for digit 4 were imaged in the first Exchange-PAINT round (green pseudocolor). After ten successive Exchange-PAINT cycles, the same structures were imaged again (blue pseudocolor). Digits represented in yellow pseudo-color on the left-hand side represent results from the first round of Exchange-PAINT imaging. Digits on the right in blue show the same structures after 10 successive Exchange-PAINT cycles. The average normalized cross-correlation coefficient for the 5 samples shown above is 0.92, demonstrating a high similarity of the structures after extensive imaging and washing steps [Scale bar: 50 nm].



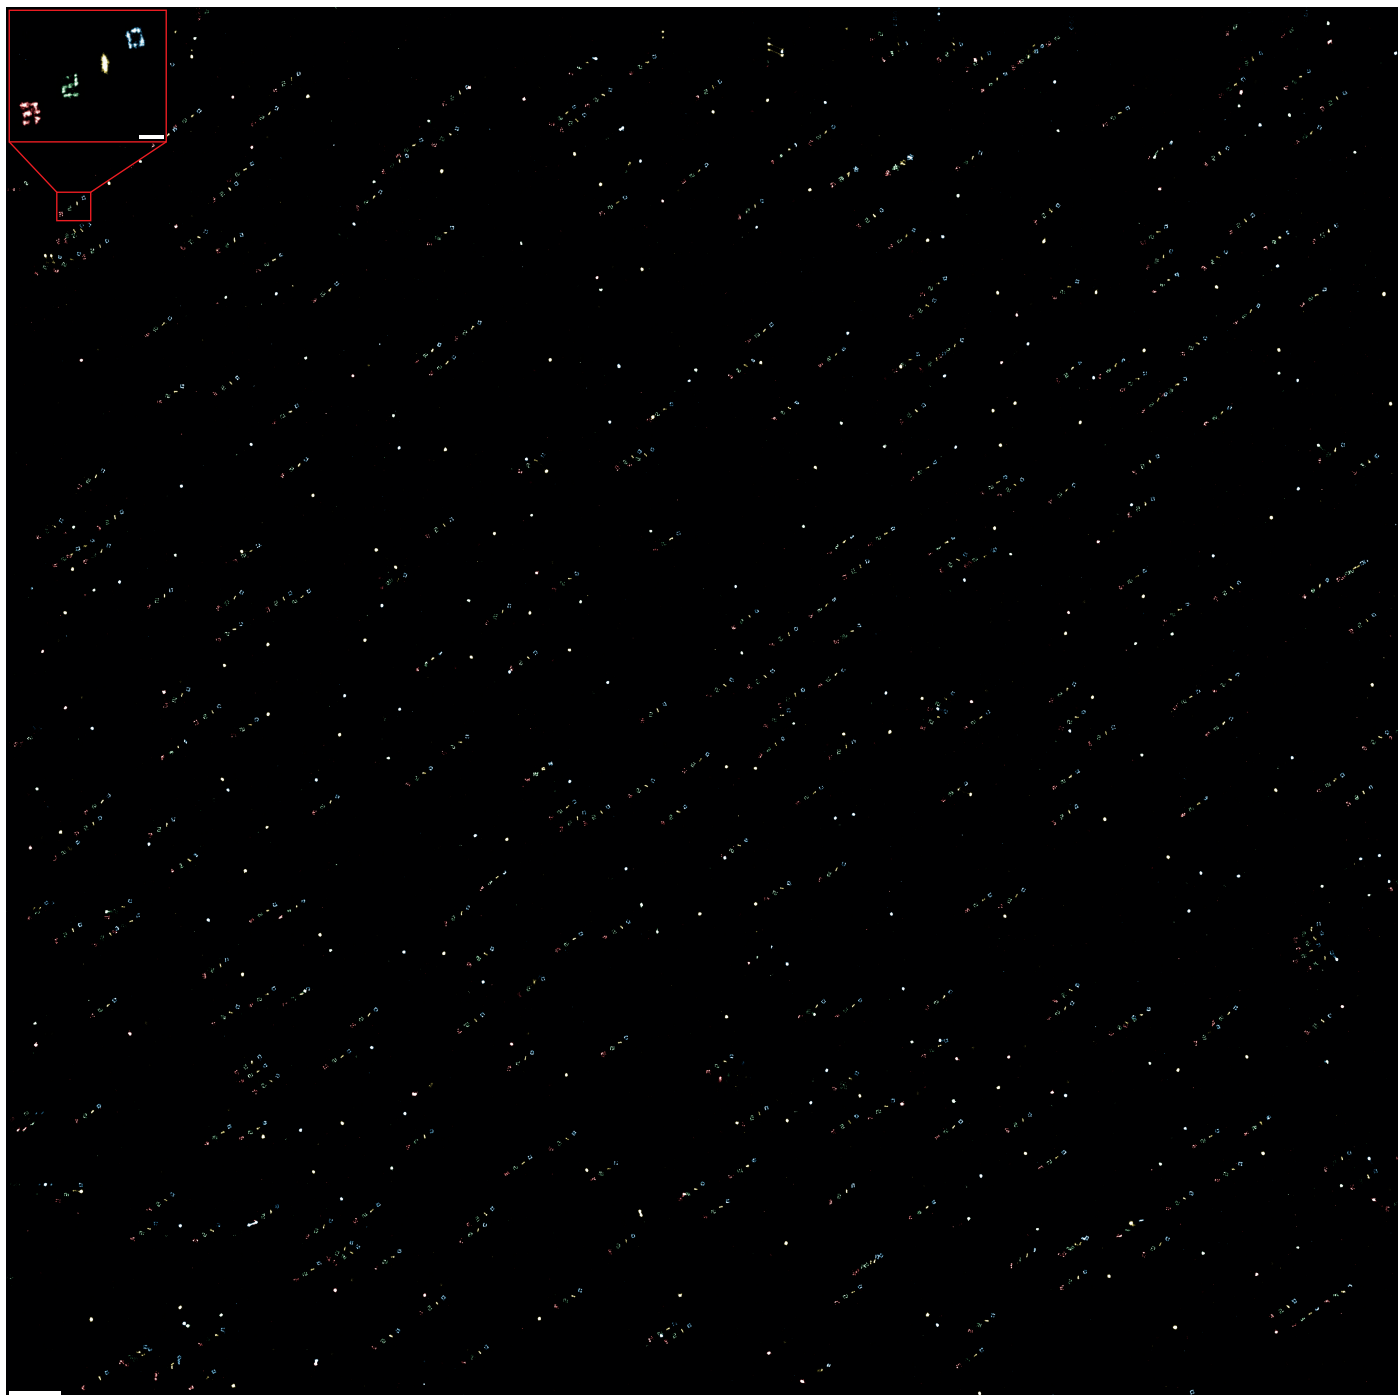

**Supplementary Figure 10 | Overview image of four-“color” *in vitro* Exchange-PAINT of digits on single DNA origami structures.** Large-view overlay of four consecutive pseudocolor images of Fig. 3e. The four images have been shifted in respect to each other for better visualization. Every origami structure displays a different digit in every imaging round. Bright spots are drift markers equipped with only one of the four docking sequences [scale bar: 1  $\mu\text{m}$ ]. Imaging conditions for each Exchange-PAINT round: 10,000 frames, 5 Hz frame rate. Excitation power density: 600 W/cm<sup>2</sup> at 647 nm. Inset: Zoom-in of highlighted region [scale bar: 100 nm]. Zoom in for details.

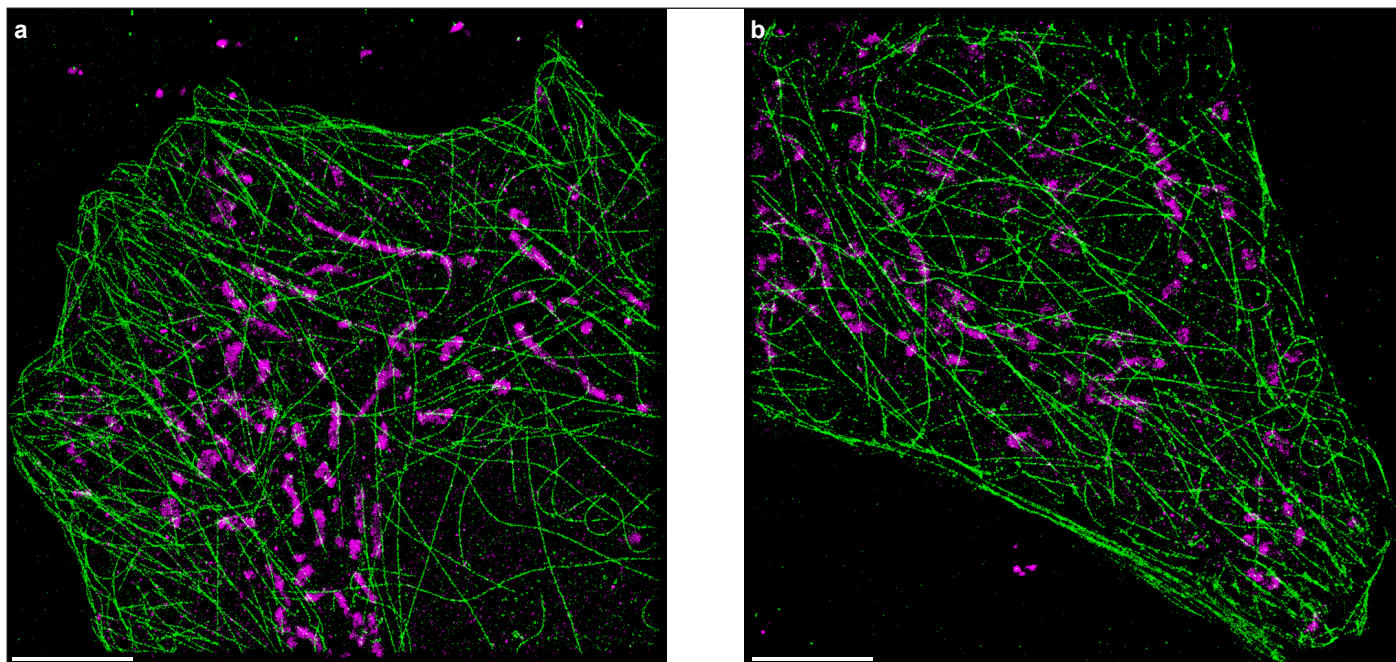

**Supplementary Figure 11 | Additional two-color Exchange-PAINT images in fixed HeLa cells. (a)** Two rounds of Exchange-PAINT using Cy3b-labeled imager strands were performed in fixed HeLa cells. Here, microtubules (green pseudo-color) were labeled with docking sequence *A* and mitochondria (magenta pseudo-color) with orthogonal docking sequence *B*. **(b)** Two rounds of Exchange-PAINT using ATTO655-labeled imager strands performed in fixed HeLa cells similar to **a** [scale bars: 5  $\mu\text{m}$ ]. Note again that all imager strands were labeled with the same fluorophore type (Cy3b in **a** and ATTO655 in **b**). Imaging conditions: 600 pM Cy3b-labeled imager strands in buffer C. 100 nm gold nanoparticles (10 nM in buffer C) were used as fiducials and channel alignment.

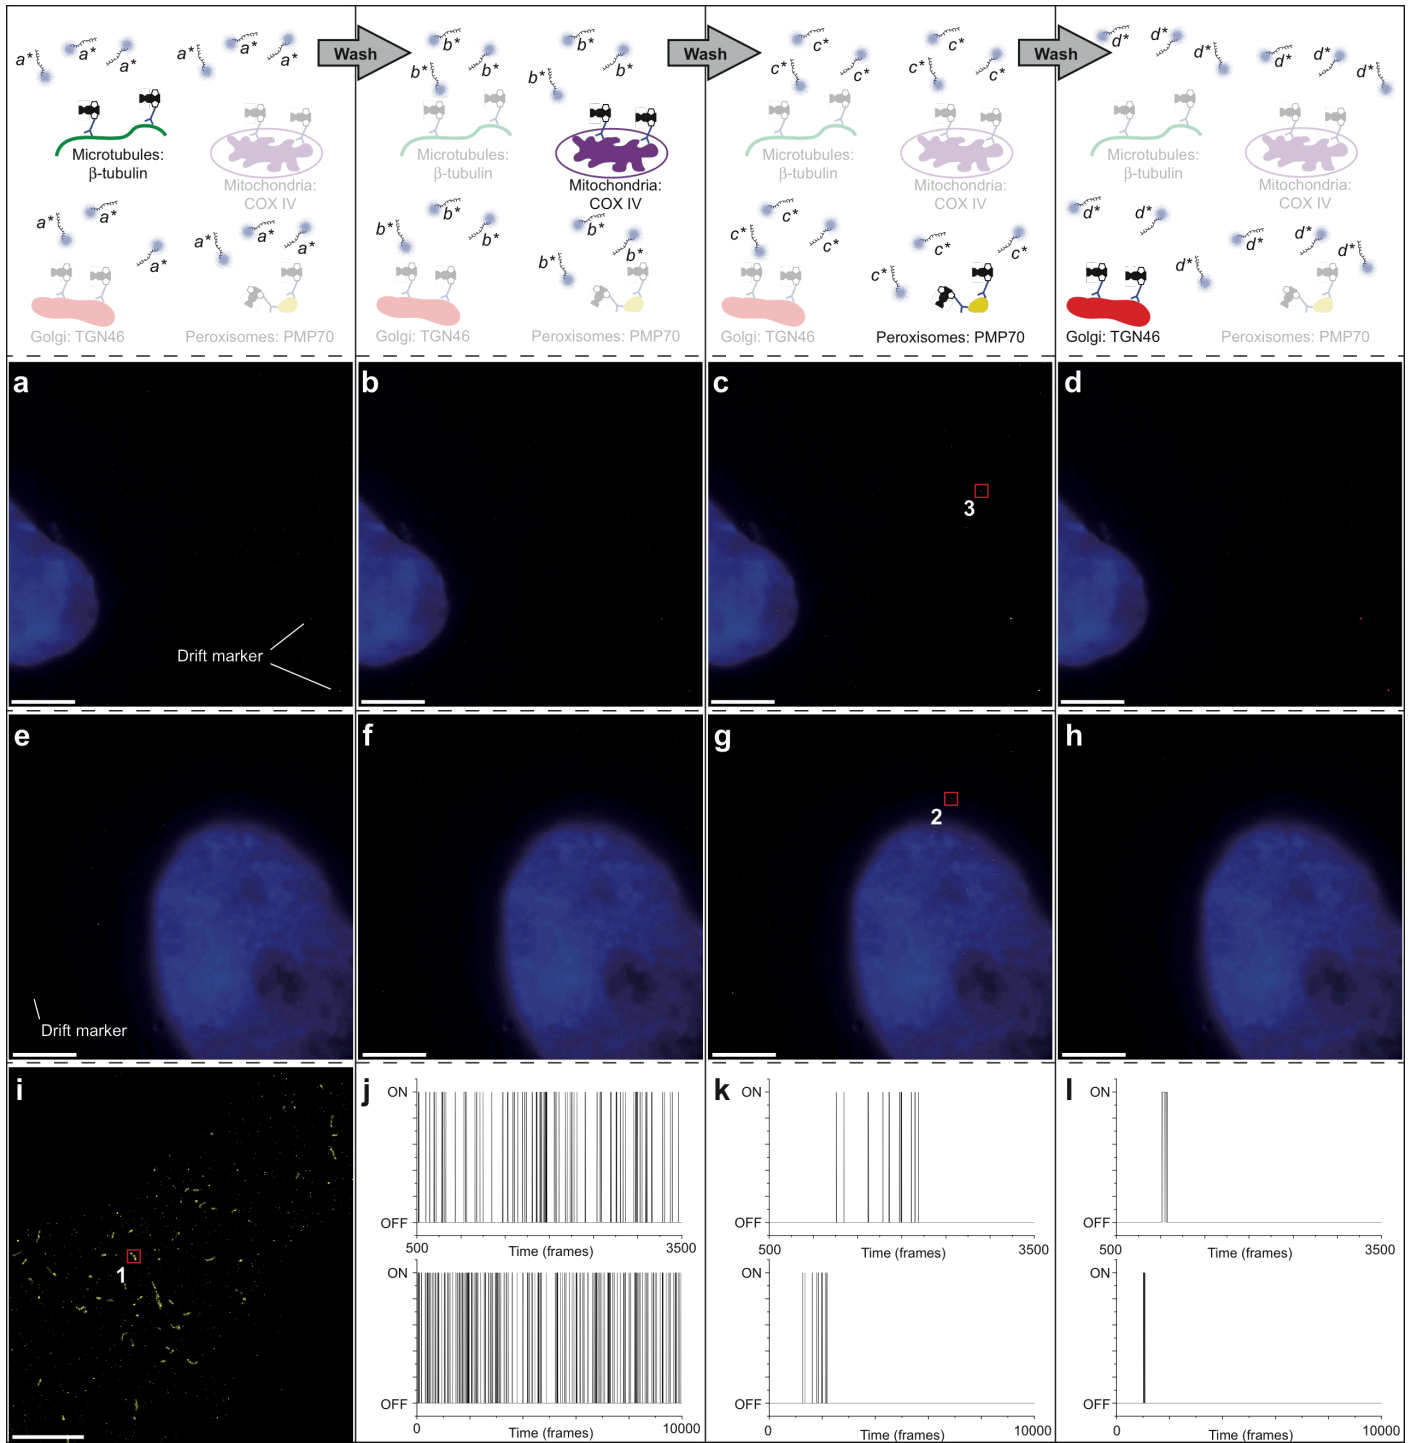

**Supplementary Figure 12 | Interactions of imager strands in Exchange-PAINT imaging with cellular components.** Results of four rounds of Exchange-PAINT imaging using the same conditions as in Fig. 4 but **without** complementary dockings strands on the antibody-streptavidin conjugates. The images show little non-specific binding interactions with cellular components or genomic DNA (Nucleus was stained with DAPI). (a–d) Imaging performed with Cy3b-labeled strands. (e–h) Imaging performed with ATTO655-labeled strands. (i) Exchange-PAINT image of PMP70 proteins from Fig. 4c to demonstrate the difference between specific and non-specific imager strand interactions. (j) Binary intensity vs. time (I vs. t) traces for a specific interaction of imager strands with complementary docking sites obtained from the highlighted region 1 in i (top is a zoom-in of the time trace on the bottom). (k) Binary I vs. t traces for a non-specific interaction of imager strands with cellular components obtained from the highlighted region 2 in g (top is a zoom-in of the time trace on the bottom). (l) Binary I vs. t traces for a non-specific interaction of imager strands with cellular components obtained from the highlighted region 3 in c (top is a zoom-in of the time trace on the bottom). As can be seen in these traces, non-specific interactions show non-repeating localization events throughout the imaging process or exhibit a different blinking signature (e.g. non-exponential distribution of ON- and OFF-times) compared to specific DNA hybridization interactions and can thus be easily identified and discarded. [Scale bars: 5  $\mu$ m]. As for *in situ* cell experiments in the main text, gold nanoparticles are here used for drift correction and channel alignment. The gold nanoparticles adsorb non-specifically to the glass bottom of the imaging chambers. The apparent movement of all gold nanoparticles in a field of view is tracked throughout the movie. The obtained trajectories are then averaged and used for global drift correction of the final super-resolution image. Zoom in for details.

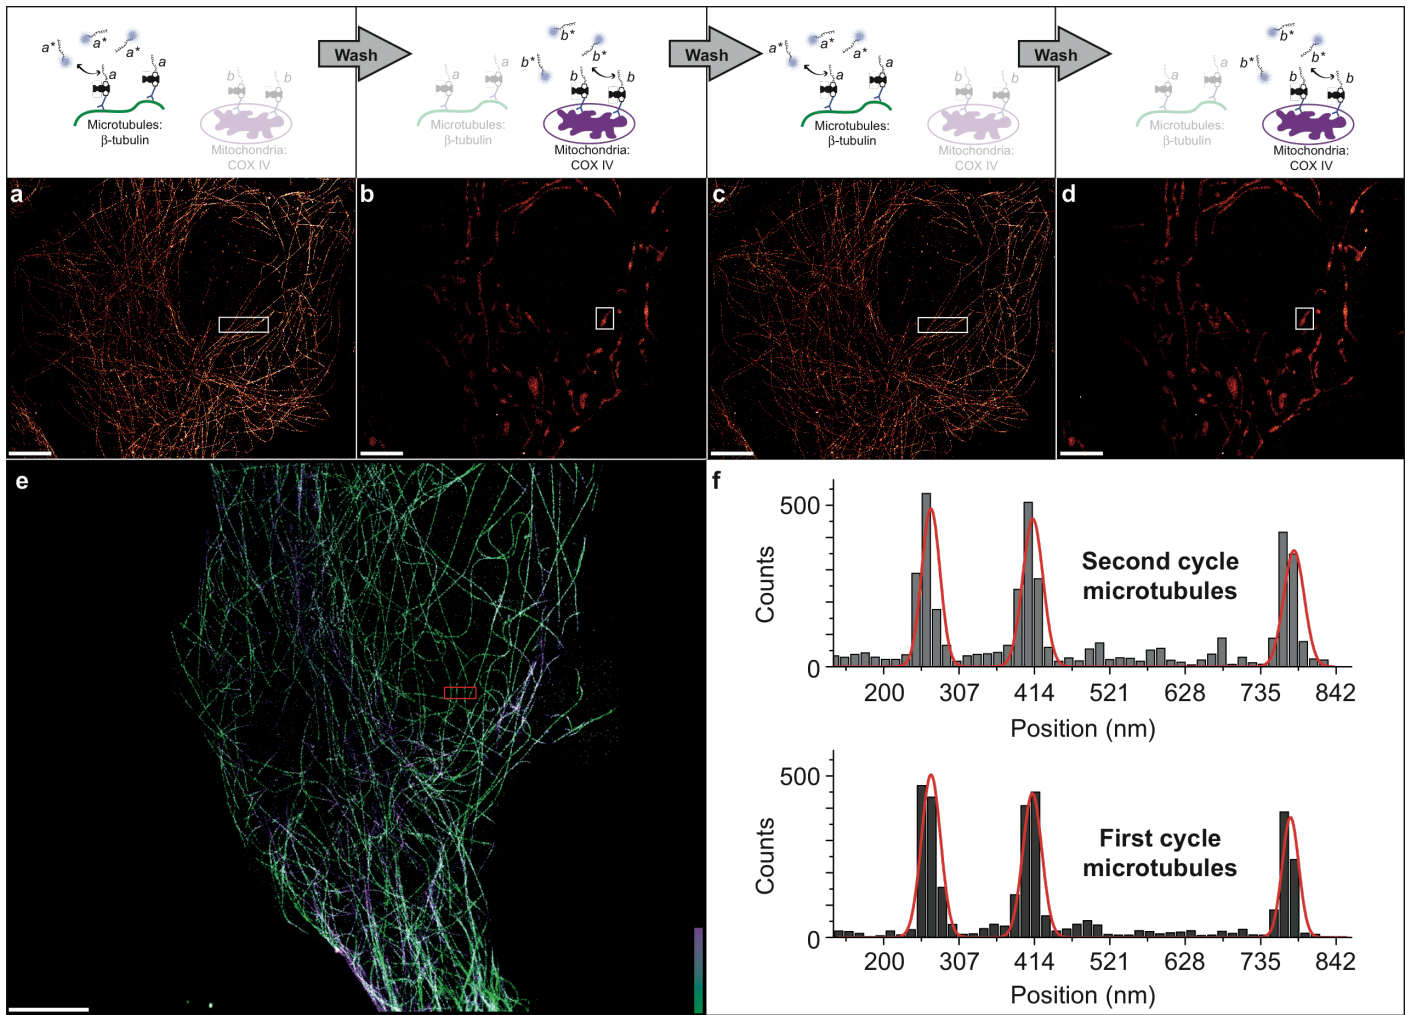

**Supplementary Figure 13 | Quantification of sample distortion in Exchange-PAINT imaging.** Four rounds of Exchange-PAINT imaging of two targets were performed, allowing quantification of possible sample distortion by comparing two images of the same target after several washing steps. **(a)** First, microtubule imaging was performed using imager sequence  $a^*$ . **(b)** After a washing step, mitochondria were imaged using sequence  $b^*$ . **(c)** After another washing step, microtubule imaging using sequence  $a^*$  was repeated. **(d)** After a final washing round, mitochondria imaging using sequence  $b^*$  was repeated.

Two analysis methods were used to assess sample distortion:

**(1)** A normalized cross-correlation coefficient was calculated between the image obtained in the first and second imaging round for microtubules and mitochondria, respectively. The same ROI (highlighted by a white rectangle in **a**, **b**, **c**, and **d**) was selected in each of the two image pairs. The cross-correlation coefficient was determined to be 0.80 and 0.96 for microtubules and mitochondria, respectively. To put this into perspective, we note, that even in a “classic” super-resolution image (without liquid exchange), one cannot expect 100 % correlation between two consecutive images due to the stochastic nature of the image formation. To show this effect, one can simply split a super-resolution RAW data set into two parts of equal length, perform a stochastic reconstruction and calculate the normalized cross-correlation coefficient for these supposedly equal images. **(e)** This analysis was performed for two subsets of equal length of the microtubule image (ROI is highlighted in red) from **Fig. 4** and a coefficient of 0.88 was obtained, similar to the Exchange-PAINT case of 0.80.

**(2)** In addition, a cross-sectional histogram analysis was used in the two Exchange-PAINT microtubule images **a** and **c** to quantitatively assess spatial shift of three fibers with respect to each other. **(f)** The cross-sectional histogram was performed on a sub-region of the white ROI in **a** and **c**. The upper and lower histograms show the localization distributions for the second and first Exchange-PAINT round, respectively. Three-component Gaussian fitting revealed a shift of fibers with respect to each other of  $\sim 5$  nm. [Scale bars: 5  $\mu$ m]. Zoom in for details.

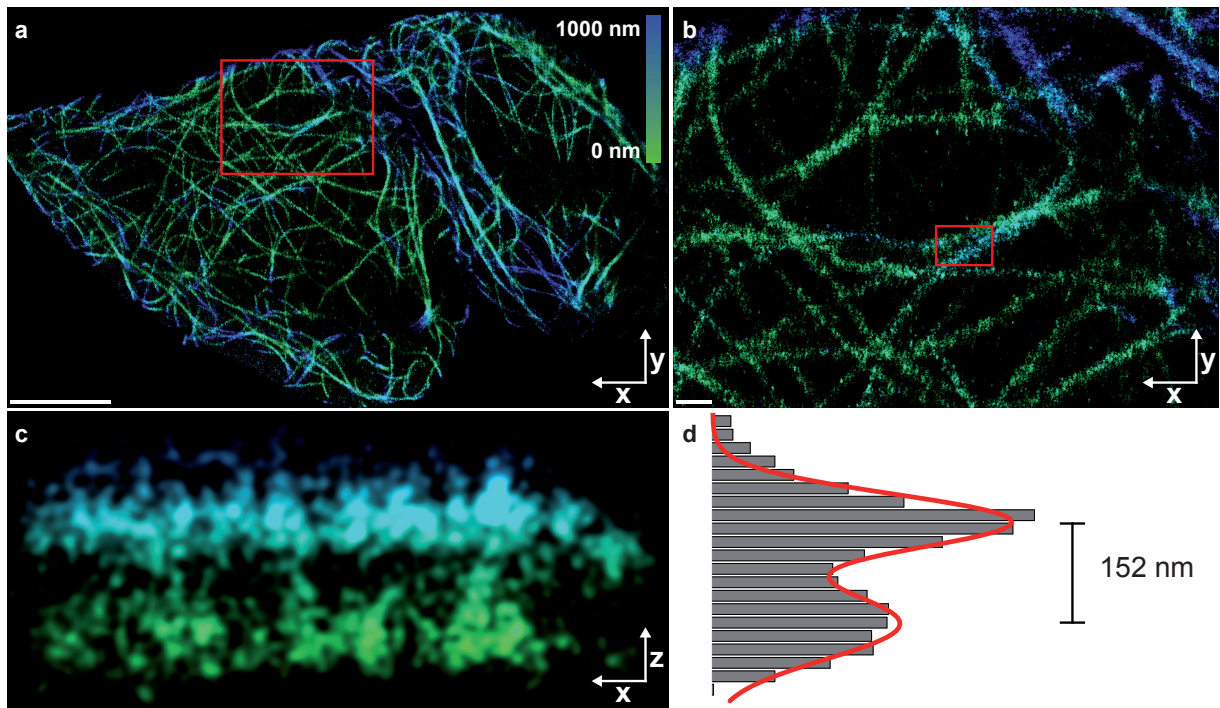

**Supplementary Figure 14 | Additional cellular 3D DNA-PAINT image.** (a) 3D DNA-PAINT super-resolution image of a microtubule network inside a fixed DLD1 cell using Cy3b-labeled imager strands (60,000 frames, 30 Hz frame rate). Color indicates height [scale bar: 5  $\mu\text{m}$ , height]. (b) Zoomed-in image of the highlighted area in a [scale bar: 500 nm]. (c) Perspective X-Z-profile of the highlighted area in b. (d) Cross-sectional histogram where points are summed along the long axis in c. A two-component Gaussian fit reveals a distance of  $\approx 152$  nm in z of two adjacent microtubules.

## Supplementary Tables

**Table S1 | Staple sequences for microtubule analog DNA structure.** The color matches the staples in the strand diagram shown in **Supplementary Figure 1**.

| Position      | Sequence                                         | Color | Description      |
|---------------|--------------------------------------------------|-------|------------------|
| 0[39]21[39]   | AGGCCACCTCACCAGTTCAACAGTGGCGTTTT                 |       | Structure strand |
| 0[79]1[79]    | CGTCAAAGGGCGAAAACATTCTGGCCATCCAC                 |       | Structure strand |
| 0[167]22[168] | AGAATGCGCAGCGCAGTACTTATAGCTCACACATTCAACTTCATAACC |       | Structure strand |
| 0[199]2[200]  | CCTTACACAGCAAATCGTTTGGGTGGTAAAAC                 |       | Structure strand |
| 0[239]21[231] | AATTCGCGTCTGGCCTAGCTTTCACAGGTCAGTACCTTTA         |       | Structure strand |
| 1[24]18[24]   | TGGCAGATGAGTAAAAAATCGCCATATTTAAGTAAATTTAGGACAAC  |       | Structure strand |
| 1[96]17[95]   | CACGCTGGTTAAACGGGTAAACAATTTGGGAAGGCTTGCACATCGGAA |       | Structure strand |
| 1[120]1[151]  | ACGGGCAACAGCTGGGTTTCTGCCAGCACTCA                 |       | Structure strand |
| 1[152]19[167] | GACGATCGCGGGCTGGGAAGAAAAATCT                     |       | Structure strand |
| 2[39]23[55]   | GTCTGAAAAACAGGAAGAAGGCTTCGGGTAGGAATCATTACCGCGCCC |       | Structure strand |
| 2[79]23[71]   | AAGAGACAGAGATAGAGACCTGAAAAATCAAGCTATTTTG         |       | Structure strand |
| 2[103]3[119]  | GTTTGATGAATCGGCAAAATTTGCGTATTGG                  |       | Structure strand |
| 2[127]31[143] | TTTTCACCCCTAAAACAAGAATAAGCACCATTACAGCGTCAGACTGT  |       | Structure strand |
| 2[199]23[207] | GGCATCAGGGAGGTGTCGAGGCATATAGCGAGAGGCTTAT         |       | Structure strand |
| 2[231]5[231]  | TTAAATGTCAACCCGTCGGCGCATAAATTTATCTCCGTGGCGGATTGA |       | Structure strand |
| 3[16]31[31]   | ATCACCCAGCCATTGCTGGATTATGAACGCGAAGGGCTTAGAACAAAG |       | Structure strand |
| 3[56]19[55]   | ACCTTCTACCCTACTGCGGGATCTTACCAGTATAAAGAAAAAGC     |       | Structure strand |
| 3[80]2[80]    | GAGTGTGTCTCCGAGTGGTCAGTTTGGAAAC                  |       | Structure strand |
| 3[120]24[128] | GCGCCAGGTGGTCTGAGGCGAAGAATTATGTTCAACAG           |       | Structure strand |
| 3[168]5[175]  | ATCCACGGCAGCAACCGCAAGAAATGACTTGTAGAACGT          |       | Structure strand |
| 4[71]5[87]    | AGAATACGAGCGTAAATCGTCGCTATTAATTA                 |       | Structure strand |
| 4[135]22[120] | CCCTCGGCAACCGCAACTAAAGTAATAATT                   |       | Structure strand |
| 4[207]6[184]  | TATGAGCATCAGCGGGCGCTTCTAACCGTGATCTGCC            |       | Structure strand |
| 5[16]22[16]   | ATCGGCCTTGCTGGTACAATATATCAATAATATCCGGTATTCTCCCA  |       | Structure strand |
| 5[32]25[31]   | ATATCTATTATCTGGTCAGTTGGCTTATCTAATCTTTCCTTACCGCAC |       | Structure strand |
| 5[52]3[55]    | CGGAACTGATTGGCACAGACAATATATGGAAAT                |       | Structure strand |
| 5[88]23[103]  | ATTTTCCTCAAAGAAAAGGCTCCAAAAGGA                   |       | Structure strand |
| 5[152]4[136]  | CGTAATCTGCCAACGGCCACAGTTGAGGAT                   |       | Structure strand |
| 5[176]22[184] | CAGCGTGGTGTGCAGGTCATTGGAAACAAAAGTAAGAG           |       | Structure strand |
| 6[95]4[72]    | GCTATATGTGAGTGAAAATTTCTTATAGCCCAGATAGTA          |       | Structure strand |
| 6[127]8[120]  | TTTCCAGTAATGAGTGAGCTAACTGAGCCGGAAGCATAAA         |       | Structure strand |
| 6[151]22[144] | TTTCCGTTCAACTTTAATCATTTTATGCGATTGTAAA            |       | Structure strand |
| 6[159]26[160] | ATAGCTGGAAATGGAGTTTCCCTCAGAACAGTATATATACGC       |       | Structure strand |
| 6[183]2[184]  | AGTTTTAAGACGATAATCTGGTCACAACCAGCTTACGGCTATGCCGGG |       | Structure strand |
| 6[207]4[208]  | GCGCATCGGCACCTCAATCCGCCGGCAACGGGAACAGCGGTTGCCG   |       | Structure strand |
| 6[231]24[208] | ATAGGTCACGTTGGTGGGAGCAAAGAGCGGAATCGTCAT          |       | Structure strand |
| 7[16]4[16]    | GAGGAAGGAAATCAACGAAACCAACCGTTGCC                 |       | Structure strand |
| 7[48]5[51]    | AAATTAACGCCACCCCAATCAATAGTCTTTAATG               |       | Structure strand |
| 7[80]25[95]   | TACATAAATCAATTAGTTATCAGCATCAATAG                 |       | Structure strand |

|                |                                                   |  |                  |
|----------------|---------------------------------------------------|--|------------------|
| 7[112]6[96]    | GGGTGCCTCGGGAAACCTAAACATAGCGATA                   |  | Structure strand |
| 7[176]25[191]  | TCAGAGGGGACGACGATTTTGGCCATAGTAAAA                 |  | Structure strand |
| 8[39]11[31]    | TGCTGATCTTTAGGAGTAGATAATCAGAGGGTTTGAACC           |  | Structure strand |
| 8[95]12[80]    | TGACCTTAAATTAATTCATATGGTCGGCTTAGATAACTATATGGAATT  |  | Structure strand |
| 8[159]10[160]  | GCTCACAAAACGCGGTCCGTTTAAGGGTAA                    |  | Structure strand |
| 8[191]8[160]   | CGGCCTCAGGAAGCGCTGGCAGCCTCCGGTCC                  |  | Structure strand |
| 9[48]25[63]    | CTAGTCAGAGGCGAAGAGCCCAACGCTAACG                   |  | Structure strand |
| 9[104]24[112]  | TCATATGCTCATTGGTGTAAGAGACGTTAGAGTGAGA             |  | Structure strand |
| 9[120]10[136]  | CCGCCAGCACCTCATGAAACAGCAAAAAATCCCGTAAAAATTTGTAC   |  | Structure strand |
| 9[136]24[144]  | GGTTGGCCGTTCCGGCATTCCACATTTCCGCAAGTACGCT          |  | Structure strand |
| 9[176]11[191]  | CGTATCGCACTCCAGCGGATAAGTAGCTCAAA                  |  | Structure strand |
| 9[208]25[223]  | GAGGGTAAGAGATCCGTCCAATACTGAAT                     |  | Structure strand |
| 10[31]27[23]   | GAGGATTTAGAAGTATTTAAATCCAATTGAGCTGAGTTAA          |  | Structure strand |
| 10[55]8[40]    | GTGCCACGTTTGACAGGACCTAATTTGCCCTGAACAAGCACATCACCT  |  | Structure strand |
| 10[95]27[95]   | ACCTTTTAAACCAAGAAACATCTCTTAAAACGAAAAGCCAGCGCCAAA  |  | Structure strand |
| 10[135]26[112] | ATCGACATGGATCAAACCTAAATTTGAGACGCATTTGTAAC         |  | Structure strand |
| 10[159]27[159] | AGTTAAACGATGCTGAAAAGCCGAGAACCGCATGTACCGTAACGGA    |  | Structure strand |
| 10[183]27[191] | CGCTTCTGCCAGGCAAGCCGTCGAGAACCCTCCCTCAG            |  | Structure strand |
| 10[215]10[184] | TGCAACCGTTCTAGCTGATACTTCCGGCAC                    |  | Structure strand |
| 11[192]26[208] | TCACCATCAATATGATATTCGGGTCAGGTT                    |  | Structure strand |
| 12[31]29[23]   | GGTTAGCCCGAACGTTATTTTGCCTAATAAGATTAGAGAG          |  | Structure strand |
| 12[55]28[32]   | AGAAATAATAGATTTTATATTATTTATCCAGCGCATTAGA          |  | Structure strand |
| 12[79]11[63]   | ATTCATTTCAACATATCAAAGACACCAGGCTTTCCAGTAACAAA      |  | Structure strand |
| 12[119]16[120] | TGGTGAAGAGACGGTCTGTAGCATGACAACGTCACCAATGGTACAACG  |  | Structure strand |
| 12[183]29[191] | ATTCGCCAGCAACTGTGCCACCCACCCCTCAGAGCCCAT           |  | Structure strand |
| 12[215]27[215] | AAAAAAGGGTGAGAATAGGATTAGCGGGTG                    |  | Structure strand |
| 13[40]27[55]   | CTGTTGCGAGAAAAATACCAGTTACAAAATAA                  |  | Structure strand |
| 13[72]30[80]   | ATCGCGCAGAGGCTAAAACATGTTGCAGTCGATCACCGTC          |  | Structure strand |
| 13[104]9[103]  | GAGGCGCGGATAGCCTCATAGGATCTAAAGTTTATTTATCAAAA      |  | Structure strand |
| 13[144]17[159] | AACTTTGATGAGTTCCACCGTAACAGAATACCGGATATTCACGG      |  | Structure strand |
| 13[168]25[183] | GTAGCTGCTTACAGCAGCACCCGGAGGGTTGAGCCCGGAATAGGTAA   |  | Structure strand |
| 13[216]14[224] | TTTTAGAACCCTCGCAAAATTAAGCAATAGCAAGGCAAGAATTAATATA |  | Structure strand |
| 14[55]16[40]   | CAGTAACACATCGGGATAAATAAGGCGCCAGT                  |  | Structure strand |
| 14[87]28[72]   | CAATTGAATACCAAGTCTTATTACAGCAAACG                  |  | Structure strand |
| 14[119]15[135] | TCCATGTTTATTGTATCATCGCCTGATAAAT                   |  | Structure strand |
| 14[223]30[208] | TTTTAAATGCAATGCCTGAGTAATAAGAGGCTGAGTAACTATTTT     |  | Structure strand |
| 15[32]29[55]   | GCAATTCATCATTTTAGTACCATAGGACAATCCAAATAAG          |  | Structure strand |
| 15[80]18[80]   | TTGCTAGAAATTTAATGGTTTGAACAGCAGCGAAAGACAGGGGAGTTA  |  | Structure strand |
| 15[96]28[104]  | AAACTTTTCAAATAACTTAGCAAATATTTCCACAG               |  | Structure strand |
| 15[160]28[168] | CGGGAACGGATCAGCTTACGCAACTTTGCCACTCAGACAT          |  | Structure strand |
| 16[119]31[111] | GAGATTTTAGTTAATGCAACGGAATTATTAGCAAAA              |  | Structure strand |
| 16[143]30[120] | CTTCATCATGACAAGACAAGTTGCTTTCATTAGCAAGG            |  | Structure strand |
| 16[191]14[160] | CAATGTGCTGCAAGGCGATTTCCAGAGGTGGAGTGCCATCTCTCACCGG |  | Structure strand |
| 16[207]19[207] | ACATTTTCGATTTCCAAATCTGCGGTACGGTGTCTGGAATTTCTGTA   |  | Structure strand |

|                |                                                  |  |                  |
|----------------|--------------------------------------------------|--|------------------|
| 16[239]29[231] | AACATCCAAGGTGTTAGTCTCTGA                         |  | Structure strand |
| 17[24]14[24]   | AATAACAGAGGCATTTAATAAGAGAAAAACAGTAATCCTGATTGTCAA |  | Structure strand |
| 17[40]18[56]   | TCGAGTTACGTCAAAAAGGAAACCGAGGAAACGCAATAAGGAACCGG  |  | Structure strand |
| 17[64]14[56]   | TCACCCATATACCGACAAGACTCTACCAGATGAATATA           |  | Structure strand |
| 17[160]31[175] | CCAGTGCCAAGCTTAACCATAGCCGGTCACCA                 |  | Structure strand |
| 17[224]31[239] | GATGCATCAATTCTACTAAAGCCAATTCACAA                 |  | Structure strand |
| 18[55]2[40]    | AATCATAATTACAACAAACGCCTAGCCAACGCCACACGACGCTCAATC |  | Structure strand |
| 18[79]21[79]   | AAGGCCGCTGCCGCATGCCAGTTATACAAATGGTTTTGAAGCGTTGC  |  | Structure strand |
| 18[111]0[96]   | AGGCTTTGACTTTTTTCATGTAACGCCTGGCCCTGAGAGAGTTGCA   |  | Structure strand |
| 18[183]30[160] | TTTCCCAGTCACGACGTTGTAAAAGCATTTCCTTATT            |  | Structure strand |
| 18[239]2[232]  | AACCAGACCTCTTTAACGCGTCAATCATTAAACATTTTACA        |  | Structure strand |
| 19[56]30[64]   | CTGTTTAGTATCATATTTTGCCTAACGAAAACCTGGC            |  | Structure strand |
| 19[96]30[96]   | CGCCTAAAGAGGATGATTAGAGCCCATTAAG                  |  | Structure strand |
| 19[168]3[167]  | ACGTTAATTTTAGGAATGTCACTGAGCCAGCGGTGCCGGTGTGGTGCC |  | Structure strand |
| 19[192]30[184] | ACAACATGTTTCATTTGACAGGATTATTCTGAAAGCCAC          |  | Structure strand |
| 19[208]30[224] | GCTCAACATGTTTTAAATGCAAACGGAAATGGCCTTGATGAATGGAA  |  | Structure strand |
| 20[159]21[135] | CCAGTCAGGAGCTTGCCCTGACGAGAAGGCAGAAAGAAC          |  | Structure strand |
| 20[223]21[199] | GATTATGCTGAATATAATGACAGGTAGAAAGCCAAAAG           |  | Structure strand |
| 21[16]1[23]    | TAATATAATTACAATATGTAGCAT                         |  | Structure strand |
| 21[40]4[32]    | AGCGAACCCAGATATAAAACGCTCTTTTGAATGGCCAGAA         |  | Structure strand |
| 21[80]22[96]   | GCCGACAATGAATACGTAATGCCACTACGAATGAAAATCTCCAAA    |  | Structure strand |
| 21[136]2[128]  | ACCAGAACGAGTATTAGCAGCGTGCCTGTTCTTCGTTTTC         |  | Structure strand |
| 21[200]1[215]  | GAATGGCTTAGAGCTTGCGGCTAAAGGTT                    |  | Structure strand |
| 21[232]6[232]  | ATTAGAGGGATTAGCTCCTTTTGACAAATGCTTTAAAGAATTAATGGG |  | Structure strand |
| 22[95]3[79]    | AAAAACAGCTTGATACCGATACTTAGCGGGTT                 |  | Structure strand |
| 22[119]2[104]  | TTTTACGGGCACCAAAGTGGCGAAAATCCT                   |  | Structure strand |
| 22[143]21[159] | TTGGGCTCCGTGAGCCTCCTAGCACCGTCGGCCCCCTAGAAGT      |  | Structure strand |
| 22[167]7[175]  | CTCTTACCGTGAAGTTGTACTCAGTTACCAGAGCACATCC         |  | Structure strand |
| 22[183]18[184] | CAACACTAAATGCAGATACATAACGATTCATCGCCAGCATCCAAGGGT |  | Structure strand |
| 22[207]21[223] | GCGGATTACCAGCCGGTCACTGTTGAGTAAGAGCGCCCTAAGAGAG   |  | Structure strand |
| 23[56]1[55]    | AATGTTGATTAAGCAAGCAAATCCCGACTATTTTGACCAGTAATA    |  | Structure strand |
| 23[72]24[56]   | CACCCGTGTAACCTTGCTTCTCCTAAAACATAATACCGTCTCGAA    |  | Structure strand |
| 23[104]5[103]  | GCCTTAGAAAGGAACGGGGAGAGGCGGTCCCTTATAAATTAGAATC   |  | Structure strand |
| 23[208]22[208] | TCATTGAATCCCCCTTAAGAGGTCATTTTT                   |  | Structure strand |
| 24[79]7[79]    | GAGAGCTACAATTTTAAACGAACCACCAGCAG                 |  | Structure strand |
| 24[127]9[135]  | TTTCAGCGGTAAATGAATTTTCTGGAGCCACCAGTTGGGC         |  | Structure strand |
| 24[143]5[151]  | AAACAACGTTTAAATTTGCGCTCAGTACCAGCTCGAATT          |  | Structure strand |
| 24[231]26[216] | CAGAAAACCAAGAGAAGTAATCGTAAATTTTGCTTACTTAACGGGG   |  | Structure strand |
| 25[64]24[80]   | AGCGAATAAGTTTATTTTGTACATTGCTTTT                  |  | Structure strand |
| 25[224]10[216] | GACCATAAATAAGTTTAGCATGTCGACCCCTGTAATACTTT        |  | Structure strand |
| 26[159]12[144] | CACCCTCCACAGGCTTACCAGTCCCGGAA                    |  | Structure strand |
| 26[207]6[208]  | TTGCTCAGCTGGATAGTACAAAGGATTGCCTGAGAGTCTTAGATGG   |  | Structure strand |
| 26[239]7[247]  | TACTGGTAATCAAAAACCCGAACGTCGATAAAAACAGGAA         |  | Structure strand |
| 27[96]10[96]   | GACAAGCCTCTGTTATGTTGGCACGGAAAAATCGGTCTGAGAGACT   |  | Structure strand |



|                |                                                   |  |                  |
|----------------|---------------------------------------------------|--|------------------|
| 27[112]14[120] | TTAGCCAGGGATAGCAACAACGCCAATCATAACGACCTGC          |  | Structure strand |
| 27[136]7[151]  | AGGAACCCACCTCATATGGGATCAACATACCACATTAATTGTGTGT    |  | Structure strand |
| 28[191]15[183] | CTCAGAACTGGGAAGCGGGCTCTTCGCTATGGCGAAAG            |  | Structure strand |
| 29[56]15[79]   | AAACGATTTCGTGTGAGAAAACAATAACGGATTGCGCTGA          |  | Structure strand |
| 29[136]27[135] | GATAGCAGGTACCAGTACAACTAGCCCAAT                    |  | Structure strand |
| 29[192]13[215] | GAAAGTATTGTCGGTGGCGATGTAGGTAAAGATTCAAAT           |  | Structure strand |
| 29[232]28[216] | ATTACCGCGTCATACATGTGCCCGTATAAAC                   |  | Structure strand |
| 30[95]14[88]   | GTGAATTATTGAGGGAGGGAAGGTCGGTCCAATCGCAAGA          |  | Structure strand |
| 30[119]29[135] | CCGGAGGACTAATACCAAGCGCGAAACAATCTAGAGTAAAAACCATC   |  | Structure strand |
| 30[183]16[192] | CAGAACCAGTTGGGTAAACGCTATAACAGTTGCAAAATGGT         |  | Structure strand |
| 30[207]17[223] | GGAACCTAGGTTGAGGCAGGTGAGACGATTGCAACTAAAAACGAGTA   |  | Structure strand |
| 30[223]15[239] | AGCCCTGCTGCCCGCAGTTTGACCGGGCGCGAGCTGAAAAATAATCA   |  | Structure strand |
| 31[112]1[119]  | TCACCAGTCACAGGAAGTTCCATTTGCCCCAGCAGAG             |  | Structure strand |
| 31[144]19[143] | AGCGCGTTTTTCATCGCGATTACCCAAATCAACGTAACATTCAGTGA   |  | Structure strand |
| 1[56]0[40]     | AAAGGGAACCGTCTATCATTATAATCAGTG                    |  | Structure strand |
| 1[80]19[95]    | TATTAAGAACCAGGTCGCAAGGTGATTCGGT                   |  | Structure strand |
| 1[216]0[200]   | TCTTAGCCTCCTGTTGCTCGTCATAAACATC                   |  | Structure strand |
| 2[183]19[191]  | TTACCTGCCGCGCTGTGCTGTCTGGTGACTCTAACGGA            |  | Structure strand |
| 5[104]6[128]   | CTTGAGTCGTGCCAGCTGCATTAATGAACGGCTGCCCGC           |  | Structure strand |
| 8[63]10[56]    | AGAGGTGATTAACACCTACATTTAATGCCTGCAACA              |  | Structure strand |
| 9[80]8[64]     | TTCATTTGTTTAAATGGAAACAGAAGATAAAAC                 |  | Structure strand |
| 11[64]9[79]    | AGAAGATGATGAAACAAAACAAAATTAACAAT                  |  | Structure strand |
| 11[216]9[239]  | AGAAGCCTTTATTAGCTAAATCGGAACATTATAATCATAT          |  | Structure strand |
| 14[159]15[159] | AAACAGGACAGATGAGACCAGGCGCATCCA                    |  | Structure strand |
| 15[184]16[208] | GGGGATAACCTGTTTAGCTATATTTTCATTTATTAGAT            |  | Structure strand |
| 17[96]15[95]   | CGAGGGTATTCATCTTCTGACCTAACGCGAGA                  |  | Structure strand |
| 19[128]18[112] | TCTGCTCAAAGCTTTGACCCCCAGCGATTGAG                  |  | Structure strand |
| 19[144]19[127] | ATAAGCGTGTTCACGGTCATACCGGATTGCCCTTCACAACACTCA     |  | Structure strand |
| 24[55]7[47]    | TCTTACGTTTTTATTTTCATCTGAATAACCTCAAATATC           |  | Structure strand |
| 24[111]7[111]  | ATTAATTGTATCGGTATTAAGACGCTGATG                    |  | Structure strand |
| 24[183]6[160]  | GAGGGGTGTATCACCTACCAGACCGGAACGTGCCGGGTC           |  | Structure strand |
| 24[207]8[192]  | AAATTTGCAAAAGAAGCAGAGGTCTCTAT                     |  | Structure strand |
| 25[32]9[47]    | TCATCGAGAACAAGTACAGCAAAATGAAAAAT                  |  | Structure strand |
| 25[96]8[96]    | AAATGTCGTCTTTCCCGAAGAGTCAATAG                     |  | Structure strand |
| 25[192]9[207]  | TGTTTAGATACCAGGCCAGAATTAATGCCGGA                  |  | Structure strand |
| 27[32]10[32]   | AACTGAACAATGGAAGTACCATATCAAAATTAAGTACGAGCCAGCATTT |  | Structure strand |
| 27[160]9[175]  | ACCAGAGCCGCATGTGGCCTTTAGTGGGAAAGTGCATGTTTCGTCT    |  | Structure strand |
| 30[63]17[63]   | ATGATTTTTGTTTAAATAAGAATAAACTCG                    |  | Structure strand |
| 30[79]0[80]    | ACCAAAAGTACCGACTTGAGCCACAACCATCAACCGATAGACTCCAA   |  | Structure strand |
| 30[159]16[144] | AGCTAGCGATCAGGTTCCGAGGCTGGCTGAC                   |  | Structure strand |
| 31[32]15[31]   | TTACCAGAAATGAAAATAGCAGCCTAATAACATAATATAAAAGATGATG |  | Structure strand |
| 31[176]0[168]  | GAGCCGCCAGTTGAGAAAAACGAACTGTGGTGTGCGGCC           |  | Structure strand |
| 13[136]12[120] | AACTGACCTTTGTGAGAGATAGACTTTCTCCG                  |  | Structure strand |
| 15[136]13[135] | TGTGTACAACGGTGTGCAAAATCCGGGGAACCG                 |  | Structure strand |

|                |                                                  |  |                        |
|----------------|--------------------------------------------------|--|------------------------|
| 27[24]13[39]   | GCCGAATTCGGGACAAGAATTGGATTATACTT                 |  | Structure strand       |
| 27[56]12[56]   | ACAACATAAAGGTGGCAATTACCTGAGAAC                   |  | Structure strand       |
| 27[216]12[216] | CCTTGAGTAACAGGCTTAATCAACGCAAGGAT                 |  | Structure strand       |
| 28[71]13[71]   | TAGAAAATACATGCCAGGTTAACGTAAA                     |  | Structure strand       |
| 28[103]13[103] | ACAAAGGGCGACATTCATGCTGATGCAAAAAC                 |  | Structure strand       |
| 28[167]13[167] | AATCAAATCACCACAAGAATCGGCGAAAC                    |  | Structure strand       |
| 28[215]12[184] | AGTACTCCTCAAGAGAAGCCACCAGCCGGATAGGCCGGAGACAGGCC  |  | Structure strand       |
|                |                                                  |  |                        |
| 1[56]0[40]     | AAAGGGAACCGTCTATCATTATAATCAGTG                   |  | DNA-PAINT docking site |
| 1[80]19[95]    | TATTAAAGAACCGGTCGCAAGGTGTATTCGGT                 |  | DNA-PAINT docking site |
| 1[216]0[200]   | TCTTAGCCTCCTGTGTGCTCGTCATAAACATC                 |  | DNA-PAINT docking site |
| 2[183]19[191]  | TTACCTGCCGCGCTGTGCTGTCTGGTGACTCTAACGGA           |  | DNA-PAINT docking site |
| 5[104]6[128]   | CTTGAGTCGTGCCAGCTGCATTAATGAACGGCTGCCCCG          |  | DNA-PAINT docking site |
| 8[63]10[56]    | AGAGGTGTATTAACACCTACATTTAATGCCTGCAACA            |  | DNA-PAINT docking site |
| 9[80]8[64]     | TTCATTTGTTTTAATGGAAACAGAAGATAAAAC                |  | DNA-PAINT docking site |
| 11[64]9[79]    | AGAAGATGATGAAACAAAACAAAATTAACAAT                 |  | DNA-PAINT docking site |
| 11[216]9[239]  | AGAAGCCTTTATTAGCTAAATCGGAACATTATAATCATAT         |  | DNA-PAINT docking site |
| 14[159]15[159] | AAACAGGACAGATGAGACCAGGCGCATCCA                   |  | DNA-PAINT docking site |
| 15[184]16[208] | GGGGATAACCTGTTTAGCTATATTTTCATTTATTAGAT           |  | DNA-PAINT docking site |
| 17[96]15[95]   | CGAGGGTATTCATCTTCTGACCTAACGCGAGA                 |  | DNA-PAINT docking site |
| 19[128]18[112] | TCTGCTCAAAGCTTTGACCCCCAGCGATTCAG                 |  | DNA-PAINT docking site |
| 19[144]19[127] | ATAAGCGTGTTCACGGTCATACCGGATTGCCCTTCACAACACTCA    |  | DNA-PAINT docking site |
| 24[55]7[47]    | TCTTACGTTTTTATTTTCATCCTGAATAACCTCAAATATC         |  | DNA-PAINT docking site |
| 24[111]7[111]  | ATTAATTGTATCGGTATTAAGACGCTGATG                   |  | DNA-PAINT docking site |
| 24[183]6[160]  | GAGGGGGTGTATCACCTACCAGACCGGAACGTGCCGGGTC         |  | DNA-PAINT docking site |
| 24[207]8[192]  | AAATTTGCAAAAGAAGCAGAGGTCCTATCTAT                 |  | DNA-PAINT docking site |
| 25[32]9[47]    | TCATCGAGAACAAGTACAGCAAATGAAAAAT                  |  | DNA-PAINT docking site |
| 25[96]8[96]    | AAATGTCGTCTTTCCCGAAGAGTCAATAG                    |  | DNA-PAINT docking site |
| 25[192]9[207]  | TGTTTAGATACCAGGCCAGAATTAATGCCGGA                 |  | DNA-PAINT docking site |
| 27[32]10[32]   | AACTGAACAATGGAAGTACCATATCAAAATTAAGTACGAGCCAGCATT |  | DNA-PAINT docking site |
| 27[160]9[175]  | ACCAGAGCCGCATGTGGCCTTTAGTGGGAAAGTCCCATGTTTCGTCT  |  | DNA-PAINT docking site |
| 30[63]17[63]   | ATGATTTTTTGTAAAATAAGAATAAACTCG                   |  | DNA-PAINT docking site |
| 30[79]0[80]    | ACCAAAAGTACCCGACTTGAGCCACAACCATCAACCGATAGACTCCAA |  | DNA-PAINT docking site |
| 30[159]16[144] | AGCTAGCGATCAGGTTCCGAGGCTGGCTGAC                  |  | DNA-PAINT docking site |
| 31[32]15[31]   | TTACCAGAATGAAAATAGCAGCCTAATAACATAATATAAAAGATGATG |  | DNA-PAINT docking site |
| 31[176]0[168]  | GAGCCGCCAGTTGAGAAAAACGAACTGTGGTGCTGCGGCC         |  | DNA-PAINT docking site |
|                |                                                  |  |                        |
| 2[9]2[10]      | TTGATTAATCAGCTCCAATAGGAACGAATTAACCGTCTTCT        |  | Connector strand       |
| 4[15]6[248]    | TGAGTAGAAGATAGATCGAGCATGTAAGTTGAATATAA           |  | Connector strand       |
| 5[232]5[15]    | CCGTAATGTAAACGTAAACTCAAAC                        |  | Connector strand       |
| 6[247]3[15]    | GCAAATATGCAAAGCGTTTTGTTATAAATTTTGTAGTAATAAC      |  | Connector strand       |
| 7[248]24[232]  | GATTGTAATCAGAAAAGCTCAGGTCTATTATAGTCACAGTT        |  | Connector strand       |
| 9[240]11[7]    | GTACCCCGGTTGATACAAAACCAAATGTAATTCGACA            |  | Connector strand       |
| 11[8]25[23]    | ACTCGTATAGACTTGATTAGAGCCGTCAACACTAACAAAACCAAG    |  | Connector strand       |

|                |                                                                     |  |                        |
|----------------|---------------------------------------------------------------------|--|------------------------|
| 13[8]26[240]   | CATTATCATTAAATTCAGAATGCTAATATCAGAGAGGAGTG                           |  | Connector strand       |
| 14[23]16[240]  | AGAAACCATGATTATCGTACCGACAAAAGGTAAAAGTGTAGCATT                       |  | Connector strand       |
| 15[240]28[8]   | TACAGTTATCATCATATTCGCCAGAAGAGCTATCGCAAGAA                           |  | Connector strand       |
| 17[8]18[240]   | TGTCCAGAAGCCCTTTTAAATCCTCATTAATAGTATCAAAGCG                         |  | Connector strand       |
| 19[3]0[248]    | GCGCCTGTTTATCAACAGAGGAGTCTGTCCATCACGCACCA                           |  | Connector strand       |
| 22[15]21[15]   | TCCTAATTTATGCATCAAAAAAGCCCGAAAGACAAGAAAA                            |  | Connector strand       |
| 24[23]7[15]    | TATCATTCCAAGAACCTGACTTACCGGGTATTACTAATAAGGAATT                      |  | Connector strand       |
| 27[237]13[7]   | TGATACAGGTAAGTTCCAATAGCAATGAGCGGAATTGAGTAA                          |  | Connector strand       |
| 28[7]27[236]   | ACAATGAAATAACCCATTAAGTAAGCCTCAGAGCATTGTA                            |  | Connector strand       |
| 30[23]17[7]    | TTACACCGACGACGACATGTTAGCTAATGCAGAACAATTC                            |  | Connector strand       |
| 31[16]31[15]   | AGATAGCCATTATAGATAAGTCTGAACTAGAAAAGTAAGC                            |  | Connector strand       |
| 31[240]0[240]  | ACAAATAATCAAATATTTTCGAGCTTCAAAAAAT                                  |  | Connector strand       |
|                |                                                                     |  |                        |
| 13[136]12[120] | AACTGACCTTTGTGAGAGATAGACTTTCTCCGCGGTTGACTGTGACCGATTC                |  | 3'-Biotin docking site |
| 15[136]13[135] | TGTGTACAACGGTGTGAAATCCGGGGAACCGCGGTTGACTGTGACCGATTC                 |  | 3'-Biotin docking site |
| 27[24]13[39]   | GCCGAATTCGGGACAAGAATTGGATTATACTTCGGTTGACTGTGACCGATTC                |  | 3'-Biotin docking site |
| 27[56]12[56]   | ACAACATAAAGTGGCAATTACCTGAGAACCGGTTGACTGTGACCGATTC                   |  | 3'-Biotin docking site |
| 27[216]12[216] | CCTTGAGTAACAGGCTTAATCAACGCAAGGATCGGTTGACTGTGACCGATTC                |  | 3'-Biotin docking site |
| 28[71]13[71]   | TAGAAAATACATGCCAGGTTTAACGTAAACGGTTGACTGTGACCGATTC                   |  | 3'-Biotin docking site |
| 28[103]13[103] | ACAAAGGGGACATTTCATGCTGATGCAAAAACCGGTTGACTGTGACCGATTC                |  | 3'-Biotin docking site |
| 28[167]13[167] | AATCAAAATCACCACAAGAATCGGCGAAACCGGTTGACTGTGACCGATTC                  |  | 3'-Biotin docking site |
| 28[215]12[184] | AGTACTCCTCAAGAGAAGCCACCAGCCGGATAGGCCGGAGACAGGCCCGGTTGACTGTGACCGATTC |  | 3'-Biotin docking site |

**Table S2 | Staple sequences for drift markers.** The color matches the staples in the strand diagram shown in **Supplementary Figure 1**.

| Position     | Sequence                                     | Color | Description            |
|--------------|----------------------------------------------|-------|------------------------|
| 0[111]1[95]  | TAAATGAATTTTCTGTATGGGATTAATTTCTTTTGATCTACATA |       | DNA-PAINT docking site |
| 0[143]1[127] | TCTAAAGTTTTGTGCTCTTCCAGCCGACAATTGATCTACATA   |       | DNA-PAINT docking site |
| 0[175]0[144] | TCCACAGACAGCCCTCATAGTTAGCGTAACGATTGATCTACATA |       | DNA-PAINT docking site |
| 0[207]1[191] | TCACCAGTACAACTACAACGCCTAGTACCAGTTGATCTACATA  |       | DNA-PAINT docking site |
| 0[239]1[223] | AGGAACCCATGTACCGTAACACTTGATATAATTGATCTACATA  |       | DNA-PAINT docking site |
| 1[32]3[31]   | AGGCTCCAGAGGCTTTGAGGACACGGGTAATTGATCTACATA   |       | DNA-PAINT docking site |
| 1[96]3[95]   | AAACAGCTTTTTGCGGGATCGTCAACACTAAATTGATCTACATA |       | DNA-PAINT docking site |
| 1[224]3[223] | GTATAGCAAACAGTTAATGCCAATCCTCATTGATCTACATA    |       | DNA-PAINT docking site |
| 2[79]0[80]   | CAGCGAAACTTGCTTTCGAGGTGTTGCTAATTGATCTACATA   |       | DNA-PAINT docking site |
| 2[111]0[112] | AAGGCCGCTGATACCGATAGTTGCGACGTTAGTTGATCTACATA |       | DNA-PAINT docking site |
| 2[143]1[159] | ATATTCGGAACCATCGCCACGAGAGAAGGATTGATCTACATA   |       | DNA-PAINT docking site |
| 2[175]0[176] | TATTAAGAAGCGGGTTTTGCTCGTAGCATTTGATCTACATA    |       | DNA-PAINT docking site |
| 2[207]0[208] | TTTCGGAAGTGCCGTCGAGAGGGTGTGTTTCGTTGATCTACATA |       | DNA-PAINT docking site |
| 3[32]5[31]   | AATACGTTTGAAAGAGGACAGACTGACCTTTTGATCTACATA   |       | DNA-PAINT docking site |
| 3[96]5[95]   | ACACTCATCCATGTTACTTAGCCGAAAGCTGCTTGATCTACATA |       | DNA-PAINT docking site |
| 3[160]4[144] | TTGACAGGCCACCACCAGCCGCGATTTGTATTGATCTACATA   |       | DNA-PAINT docking site |
| 3[224]5[223] | TTAAAGCCAGAGCCGCCACCCTCGACAGAATTGATCTACATA   |       | DNA-PAINT docking site |

|                |                                               |  |                        |
|----------------|-----------------------------------------------|--|------------------------|
| 4[143]3[159]   | TCATCGCCAACAAAGTACAACGGACGCCAGCATTGATCTACATA  |  | DNA-PAINT docking site |
| 5[32]7[31]     | CATCAAGTAAAAACGAACTAACGAGTTGAGATTGATCTACATA   |  | DNA-PAINT docking site |
| 5[96]7[95]     | TCATTGAGATGCGATTTTAAGAACAGGCATAGTTGATCTACATA  |  | DNA-PAINT docking site |
| 5[224]7[223]   | TCAAGTTTCATTAAGGTGAATATAAAAGATTGATCTACATA     |  | DNA-PAINT docking site |
| 6[47]4[48]     | TACGTTAAAGTAATCTTGACAAGAACCGAACCTTGATCTACATA  |  | DNA-PAINT docking site |
| 6[79]4[80]     | TTATACCACCAAATCAACGTAACGAACGAGTTGATCTACATA    |  | DNA-PAINT docking site |
| 6[111]4[112]   | ATTACCTTTGAATAAGGCTTGCCCAAATCCGCTTGATCTACATA  |  | DNA-PAINT docking site |
| 6[143]5[159]   | GATGGTTTGAACGAGTAGTAAATTTACCATTATTGATCTACATA  |  | DNA-PAINT docking site |
| 6[175]4[176]   | CAGCAAAAGGAAACGTCACCAATGAGCCGCTTGATCTACATA    |  | DNA-PAINT docking site |
| 6[207]4[208]   | TCACCGACGCACCGTAATCAGTAGCAGAACCCTTGATCTACATA  |  | DNA-PAINT docking site |
| 6[239]4[240]   | GAAATTATTGCTTTTAGCGTCAGACCGGAACCTTGATCTACATA  |  | DNA-PAINT docking site |
| 6[271]4[272]   | ACCGATTGTCGGCATTTCGGTCATAATCATTGATCTACATA     |  | DNA-PAINT docking site |
| 7[32]9[31]     | TTTAGGACAAATGCTTTAAACAATCAGGTCTTGATCTACATA    |  | DNA-PAINT docking site |
| 7[96]9[95]     | TAAGAGCAAATGTTTAGACTGGATAGGAAGCCTTGATCTACATA  |  | DNA-PAINT docking site |
| 7[160]8[144]   | TTATTACGAAGAAGCTGGCATGATTGCGAGAGGTTGATCTACATA |  | DNA-PAINT docking site |
| 7[224]9[223]   | AACGCAAAGATAGCCGAACAAACCCTGAACTTGATCTACATA    |  | DNA-PAINT docking site |
| 8[143]7[159]   | CTTTTGCAGATAAAAACCAAATAAAGACTCCTTGATCTACATA   |  | DNA-PAINT docking site |
| 9[32]11[31]    | TTACCCCAACATGTTTAAATTTCCATATTGATCTACATA       |  | DNA-PAINT docking site |
| 9[64]11[63]    | CGGATTGCAGAGCTTAATTGCTGAAACGAGTATTGATCTACATA  |  | DNA-PAINT docking site |
| 9[96]11[95]    | CGAAAGACTTTGATAAGAGGTCATATTTCGCATTGATCTACATA  |  | DNA-PAINT docking site |
| 9[128]11[127]  | GCTTCAATCAGGATTAGAGAGTATTTCATTGATCTACATA      |  | DNA-PAINT docking site |
| 9[192]11[191]  | TTAGACGGCCAAATAAGAAACGATAGAAGCCTTGATCTACATA   |  | DNA-PAINT docking site |
| 9[224]11[223]  | AAAGTCACAAAATAAACAGCCAGCGTTTTATTGATCTACATA    |  | DNA-PAINT docking site |
| 9[256]11[255]  | GAGAGATAGAGCGTCTTCCAGAGTTTTGAATTGATCTACATA    |  | DNA-PAINT docking site |
| 10[47]8[48]    | CTGTAGCTTGACTATTATAGTCAGTTCATTGATTGATCTACATA  |  | DNA-PAINT docking site |
| 10[79]8[80]    | GATGGCTTATCAAAAAGATTAAGAGCGTCCTTGATCTACATA    |  | DNA-PAINT docking site |
| 10[111]8[112]  | TTGCTCCTTTCAAATATCGCGTTTGAGGGGGTTGATCTACATA   |  | DNA-PAINT docking site |
| 10[143]9[159]  | CCAACAGGAGCGAACCCAGACCGGAGCCTTTACTTGATCTACATA |  | DNA-PAINT docking site |
| 10[175]8[176]  | TTAACGTCTAACATAAAAAACGGTAACGGATTGATCTACATA    |  | DNA-PAINT docking site |
| 10[207]8[208]  | ATCCCAATGAGAATTAAGTGAACAGTTACCAGTTGATCTACATA  |  | DNA-PAINT docking site |
| 10[239]8[240]  | GCCAGTTAGAGGTAATTGAGCGCTTTAAGAATTGATCTACATA   |  | DNA-PAINT docking site |
| 10[271]8[272]  | ACGCTAACACCCACAAGAATTGAAAATAGCTTGATCTACATA    |  | DNA-PAINT docking site |
| 12[143]11[159] | TTCTACTACGCGAGCTGAAAAGGTTACCGCGCTTGATCTACATA  |  | DNA-PAINT docking site |
| 13[32]15[31]   | AACGCAAATCGATGAACGGTACCGGTTGATTGATCTACATA     |  | DNA-PAINT docking site |
| 13[64]15[63]   | TATATTTGTCATTGCTGAGAGTGAAGATTTGATCTACATA      |  | DNA-PAINT docking site |
| 13[96]15[95]   | TAGGTAAACTATTTTTGAGAGATCAAACGTTATTGATCTACATA  |  | DNA-PAINT docking site |
| 13[128]15[127] | GAGACAGCTAGCTGATAAATTAATTTTTGTTGATCTACATA     |  | DNA-PAINT docking site |
| 13[192]15[191] | GTAAAGTAATCGCCATATTTAACAAAACCTTTTTGATCTACATA  |  | DNA-PAINT docking site |
| 13[224]15[223] | ACAACATGCCAACGCTCAACAGTCTTCTGATTGATCTACATA    |  | DNA-PAINT docking site |
| 13[256]15[255] | GTTTATCAATATGCGTTATACAAAACCGACTTGATCTACATA    |  | DNA-PAINT docking site |
| 14[271]12[272] | TTAGTATCACAATAGATAAGTCCACGAGCATTGATCTACATA    |  | DNA-PAINT docking site |
| 15[32]17[31]   | TAATCAGCGGATTGACCGTAATCGTAACCGTTGATCTACATA    |  | DNA-PAINT docking site |
| 15[96]17[95]   | ATATTTTGGCTTTCATCAACATTTATCCAGCCATTGATCTACATA |  | DNA-PAINT docking site |
| 15[160]16[144] | ATCGCAAGTATGTAATGCTGATGATAGGAACCTTGATCTACATA  |  | DNA-PAINT docking site |

|                |                                                       |                        |
|----------------|-------------------------------------------------------|------------------------|
| 15[224]17[223] | CCTAAATCAAATCATAGGTCTAAACAGTATTGATCTACATA             | DNA-PAINT docking site |
| 16[143]15[159] | GCCATCAAGCTCATTTTTTAACCACAAATCCATTGATCTACATA          | DNA-PAINT docking site |
| 17[32]19[31]   | TGCATCTTCCCAGTCACGACGGCCTGCAGTTGATCTACATA             | DNA-PAINT docking site |
| 17[96]19[95]   | GCTTTCGATTACGCCAGCTGGCGGCTGTTTCTTGATCTACATA           | DNA-PAINT docking site |
| 17[224]19[223] | CATAAATCTTTGAATACCAAGTGTTAGAACTTGATCTACATA            | DNA-PAINT docking site |
| 18[47]16[48]   | CCAGGGTTGCCAGTTTGGGGGACCCGTGGGATTGATCTACATA           | DNA-PAINT docking site |
| 18[79]16[80]   | GATGTGCTTCAGGAAGATCGCACAATGTGATTGATCTACATA            | DNA-PAINT docking site |
| 18[111]16[112] | TCTTCGCTGCACCGCTTCTGGTGCGGCCTTCCTTGATCTACATA          | DNA-PAINT docking site |
| 18[143]17[159] | CAACTGTGCGCCATTGCGCCATTCAAACATCATTGATCTACATA          | DNA-PAINT docking site |
| 18[175]16[176] | CTGAGCAAAAATTAATTACATTTTGGGTTATTGATCTACATA            | DNA-PAINT docking site |
| 18[207]16[208] | CGCGCAGATTACCTTTTAAATGGGAGAGACTTTGATCTACATA           | DNA-PAINT docking site |
| 18[239]16[240] | CCTGATTGCAATATATGTGAGTGATCAATAGTTTGATCTACATA          | DNA-PAINT docking site |
| 18[271]16[272] | CTTTTACAAAATCGTCGCTATTAGCGATAGTTGATCTACATA            | DNA-PAINT docking site |
| 19[32]21[31]   | GTCGACTTCGGCCAACGCGGGGTTTTCTTGATCTACATA               | DNA-PAINT docking site |
| 19[96]21[95]   | CTGTGTGATTGCGTTGCGCTCCTAGAGTTGCTTGATCTACATA           | DNA-PAINT docking site |
| 19[160]20[144] | GCAATTCACATATTCCTGATTATCAAAGTGTATTGATCTACATA          | DNA-PAINT docking site |
| 19[224]21[223] | CTACCATAGTTTGGTAAACATTTAAAATATTGATCTACATA             | DNA-PAINT docking site |
| 20[143]19[159] | AAGCCTGGTACGAGCCGGAAGCATAGATGTTGATCTACATA             | DNA-PAINT docking site |
| 21[96]23[95]   | AGCAAGCGTAGGGTTGAGTGTGTAGGGAGCCTTGATCTACATA           | DNA-PAINT docking site |
| 21[160]22[144] | TCAATATCGAACCTCAAATATCAATTCGAAATTGATCTACATA           | DNA-PAINT docking site |
| 21[224]23[223] | CTTTAGGCCTGCAACAGTGCCAATACGTGTTGATCTACATA             | DNA-PAINT docking site |
| 22[47]20[48]   | CTCCAACGCAGTGAGACGGGCAACCAGCTGCATTGATCTACATA          | DNA-PAINT docking site |
| 22[79]20[80]   | TGGAACAACCGCCTGGCCCTGAGGCCCGCTTTGATCTACATA            | DNA-PAINT docking site |
| 22[111]20[112] | GCCCAGAGTCCACGCTGGTTTGCAGCTAACTTTGATCTACATA           | DNA-PAINT docking site |
| 22[143]21[159] | TCGGCAAATCCGTTTGTGATGGTGGACCTCAATTGATCTACATA          | DNA-PAINT docking site |
| 22[175]20[176] | ACCTTGCTTGGTCAGTTGGCAAAGAGCGGATTGATCTACATA            | DNA-PAINT docking site |
| 22[207]20[208] | AGCCAGCAATTGAGGAAGTTATCATCATTTTTTGATCTACATA           | DNA-PAINT docking site |
| 22[239]20[240] | TTAACACCAGCCTAACAATAATCGTTATTATTGATCTACATA            | DNA-PAINT docking site |
| 22[271]20[272] | CAGAAGATTAGATAATACATTTGTGCGACAATTGATCTACATA           | DNA-PAINT docking site |
| 23[64]22[80]   | AAAGCACTAAATCGGAACCCTAATCCAGTTTTGATCTACATA            | DNA-PAINT docking site |
| 23[96]22[112]  | CCCGATTAGAGCTTGACGGGAAAAAGAATATTGATCTACATA            | DNA-PAINT docking site |
| 23[128]23[159] | AACGTGGCGAGAAAGGAAGGAAACCAGTAATTGATCTACATA            | DNA-PAINT docking site |
| 23[160]22[176] | TAAAAGGGACATTCTGGCCAACAAGCATCTTGATCTACATA             | DNA-PAINT docking site |
| 23[192]22[208] | ACCCTTCTGACCTGAAAGCGTAAGACGCTGAGTTGATCTACATA          | DNA-PAINT docking site |
| 7[56]9[63]     | ATGCAGATACATAACGGGAATCGTCATAAAATAAAGCAAAGTTGATCTACATA | DNA-PAINT docking site |
| 7[120]9[127]   | CGTTTACCAGACGCACAAAGAAGTTTTGCCATAATTGATCTACATA        | DNA-PAINT docking site |
| 7[184]9[191]   | CGTAGAAAATACATACCAGGAAACGCAATAAGAAGCGCATTGATCTACATA   | DNA-PAINT docking site |
| 7[248]9[255]   | GTTTATTTTGTACAACTCTTACCGAAGCCCTTAAATATCATTGATCTACATA  | DNA-PAINT docking site |
| 11[32]13[31]   | AACAGTTTGTACAAAAACATTTTATTTCTTGATCTACATA              | DNA-PAINT docking site |
| 11[64]13[63]   | GATTTAGTCAATAAAGCCTCAGAGAACCCTCATTGATCTACATA          | DNA-PAINT docking site |
| 11[96]13[95]   | AATGGTCAACAGGCAAGGCAAGAGTAATGTGTTGATCTACATA           | DNA-PAINT docking site |
| 11[128]13[127] | TTTGGGATAGTAGTAGCATTAAAAGCCGTGATCTACATA               | DNA-PAINT docking site |
| 11[160]12[144] | CCAATAGCTCATCGTAGGAATCATGGCATCAATTGATCTACATA          | DNA-PAINT docking site |
| 11[192]13[191] | TATCCGTCTCATCGAGAACAAGCGACAAAAGTTGATCTACATA           | DNA-PAINT docking site |

|                |                                                       |  |                        |
|----------------|-------------------------------------------------------|--|------------------------|
| 11[224]13[223] | GCGAACCTCCAAGAACGGGTATGACAATAATTGATCTACATA            |  | DNA-PAINT docking site |
| 11[256]13[255] | GCCTTAAACCAATCAATAATCGGCACGCGCCTTTGATCTACATA          |  | DNA-PAINT docking site |
| 14[47]12[48]   | AACAAGAGGGATAAAAAATTTTAGCATAAAGCTTGATCTACATA          |  | DNA-PAINT docking site |
| 14[79]12[80]   | GCTATCAGAAATGCAATGCCTGAATTAGCATTGATCTACATA            |  | DNA-PAINT docking site |
| 14[111]12[112] | GAGGGTAGGATTCAAAAGGGTGAGACATCCAATTGATCTACATA          |  | DNA-PAINT docking site |
| 14[143]13[159] | CAACCGTTTCAAATCACCATCAATTCGAGCCATTGATCTACATA          |  | DNA-PAINT docking site |
| 14[175]12[176] | CATGTAATAGAAATATAAAGTACCAAGCCGTTTGATCTACATA           |  | DNA-PAINT docking site |
| 14[207]12[208] | AATTGAGAATTCTGTCCAGACGACTAAACCAATTGATCTACATA          |  | DNA-PAINT docking site |
| 14[239]12[240] | AGTATAAAGTTCAGCTAATGCAGATGTCTTTCTTGATCTACATA          |  | DNA-PAINT docking site |
| 21[120]23[127] | CCCAGCAGGCGAAAAATCCCTTATAAATCAAGCCGGGTTGATCTACATA     |  | DNA-PAINT docking site |
| 21[184]23[191] | TCAACAGTTGAAAGGAGCAAAATGAAAAATCTAGAGATAGATTGATCTACATA |  | DNA-PAINT docking site |
| 1[160]2[144]   | TTAGGATTGGCTGAGACTCCTCAATAACCGATTTGATCTACATA          |  | DNA-PAINT docking site |
| 4[47]2[48]     | GACCAACTAATGCCACTACGAAGGGGTAGCATTGATCTACATA           |  | DNA-PAINT docking site |
| 4[79]2[80]     | GCGCAGACAAGAGGCAAAAGAATCCCTCAGTTGATCTACATA            |  | DNA-PAINT docking site |
| 4[111]2[112]   | GACCTGCTCTTTGACCCCGAGGAGGAGTTATTGATCTACATA            |  | DNA-PAINT docking site |
| 4[175]2[176]   | CACCAGAAAGGTTGAGGCAGGTCATGAAAGTTGATCTACATA            |  | DNA-PAINT docking site |
| 4[207]2[208]   | CCACCTCTATTACAAAACAAATACCTGCCTATTGATCTACATA           |  | DNA-PAINT docking site |
| 4[239]2[240]   | GCCTCCCTCAGAATGGAAGCGCAGTAACAGTTTGATCTACATA           |  | DNA-PAINT docking site |
| 4[271]2[272]   | AAATCACCTTCCAGTAAGCGTCAGTAATAATTGATCTACATA            |  | DNA-PAINT docking site |
| 5[160]6[144]   | GCAAGGCCTCACCAGTAGCACCATGGGCTTGATTGATCTACATA          |  | DNA-PAINT docking site |
| 8[47]6[48]     | ATCCCCCTATACCACATTCAACTAGAAAAATCTTGATCTACATA          |  | DNA-PAINT docking site |
| 8[79]6[80]     | AATACTGCCCAAAGGAATTACGTGGCTCATTGATCTACATA             |  | DNA-PAINT docking site |
| 8[111]6[112]   | AATAGTAAACACTATCATAACCCTCATTGTGATTGATCTACATA          |  | DNA-PAINT docking site |
| 8[175]6[176]   | ATACCCAACAGTATGTTAGCAAATTAGAGCTTGATCTACATA            |  | DNA-PAINT docking site |
| 8[207]6[208]   | AAGGAAACATAAAGGTGGCAACATTATCACCGTTGATCTACATA          |  | DNA-PAINT docking site |
| 8[239]6[240]   | AAGTAAGCAGACACCACGGAATAATATTGACGTTGATCTACATA          |  | DNA-PAINT docking site |
| 8[271]6[272]   | AATAGCTATCAATAGAAAATCAACATTCATTGATCTACATA             |  | DNA-PAINT docking site |
| 9[160]10[144]  | AGAGAGAAAAAATGAAAATAGCAAGCAAACTTTGATCTACATA           |  | DNA-PAINT docking site |
| 12[47]10[48]   | TAAATCGGGATTCCCAATTCTGCGATATAATGTTGATCTACATA          |  | DNA-PAINT docking site |
| 12[79]10[80]   | AAATTAAGTTGACCATTAGATACTTTTGCCTTGATCTACATA            |  | DNA-PAINT docking site |
| 12[111]10[112] | TAAATCATATAACCTGTTTAGCTAACCTTTAATTGATCTACATA          |  | DNA-PAINT docking site |
| 12[175]10[176] | TTTTATTTAAGCAAATCAGATATTTTTTGTTGATCTACATA             |  | DNA-PAINT docking site |
| 12[207]10[208] | GTACCGCAATTCTAAGAACGCGAGTATTATTTTGATCTACATA           |  | DNA-PAINT docking site |
| 12[239]10[240] | CTTATCATTTCCGACTTGCAGGAGCCTAATTTTGATCTACATA           |  | DNA-PAINT docking site |
| 12[271]10[272] | TGTAGAAATCAAGATTAGTTGCTCTTACCATTGATCTACATA            |  | DNA-PAINT docking site |
| 13[160]14[144] | GTAATAAGTTAGGCAGAGGCATTTATGATATTTTGATCTACATA          |  | DNA-PAINT docking site |
| 16[47]14[48]   | ACAAACGGAAAAGCCCCAAAAACACTGGAGCATTGATCTACATA          |  | DNA-PAINT docking site |
| 16[79]14[80]   | GCGAGTAAAAATATTTAAATTGTTACAAAGTTGATCTACATA            |  | DNA-PAINT docking site |
| 16[111]14[112] | TGTAGCCATTAAAATTCGCATAAAATGCCGGATTGATCTACATA          |  | DNA-PAINT docking site |
| 16[175]14[176] | TATAACTAACAAAGAACGCGAGAACGCCAATTGATCTACATA            |  | DNA-PAINT docking site |
| 16[207]14[208] | ACCTTTTTATTTTAGTTAATTCATAGGGCTTTTGATCTACATA           |  | DNA-PAINT docking site |
| 16[239]14[240] | GAATTTATTTAATGGTTGAAATATTCTTACCTTGATCTACATA           |  | DNA-PAINT docking site |
| 16[271]14[272] | CTTAGATTTAAGGCGTTAAATAAAGCCTGTTTGATCTACATA            |  | DNA-PAINT docking site |
| 17[160]18[144] | AGAAAACAAAGAAGATGATGAAACAGGCTGCGTTGATCTACATA          |  | DNA-PAINT docking site |

|                |                                                    |  |                        |
|----------------|----------------------------------------------------|--|------------------------|
| 20[47]18[48]   | TTAATGAACTAGAGGATCCCCGGGGGTAACGTTGATCTACATA        |  | DNA-PAINT docking site |
| 20[79]18[80]   | TTCCAGTCGTAATCATGGTCATAAAAGGGGTTGATCTACATA         |  | DNA-PAINT docking site |
| 20[111]18[112] | CACATTTAAATTGTTATCCGCTCATGCGGGCCTTGATCTACATA       |  | DNA-PAINT docking site |
| 20[175]18[176] | ATTATCATTTCAATATAATCCTGACAATTACTTGATCTACATA        |  | DNA-PAINT docking site |
| 20[207]18[208] | GCGGAACATCTGAATAATGGAAGGTACAAAATTTGATCTACATA       |  | DNA-PAINT docking site |
| 20[239]18[240] | ATTTTAAATCAAATTTATTTGCACGGATTGTTGATCTACATA         |  | DNA-PAINT docking site |
| 20[271]18[272] | CTCGTATTAGAAATTGCGTAGATACAGTACTTGATCTACATA         |  | DNA-PAINT docking site |
| 0[47]1[31]     | AGAAAGGAACAATAAAGGAATTCAAAAAATTTGATCTACATA         |  | DNA-PAINT docking site |
| 0[79]1[63]     | ACAACTTTCAACAGTTTCAGCGGATGTATCGGTTGATCTACATA       |  | DNA-PAINT docking site |
| 0[271]1[255]   | CCACCCTCATTTTCAGGGATAGCAACCGTACTTTGATCTACATA       |  | DNA-PAINT docking site |
| 2[47]0[48]     | ACGGCTACAAAAGGAGCCTTTAATGTGAGAATTTGATCTACATA       |  | DNA-PAINT docking site |
| 2[239]0[240]   | GCCCCGTATCCGGAATAGGTGTATCAGCCCAATTTGATCTACATA      |  | DNA-PAINT docking site |
| 2[271]0[272]   | GTTTTAACTTAGTACCGCCACCCAGAGCCATTGATCTACATA         |  | DNA-PAINT docking site |
| 21[32]23[31]   | TTTTCACTCAAAGGGCGAAAAACCATCACCTTGATCTACATA         |  | DNA-PAINT docking site |
| 21[56]23[63]   | AGCTGATTGCCCTTCAGAGTCCACTATTAAGGGTGCCGTTGATCTACATA |  | DNA-PAINT docking site |
| 21[248]23[255] | AGATTAGAGCCGTCAAAAAACAGAGGTGAGGCCATTAGTTGATCTACATA |  | DNA-PAINT docking site |
| 23[32]22[48]   | CAAATCAAGTTTTTTGGGGTCGAAACGTGGATTGATCTACATA        |  | DNA-PAINT docking site |
| 23[224]22[240] | GCACAGACAATATTTTTGAATGGGGTCAGATTGATCTACATA         |  | DNA-PAINT docking site |
| 23[256]22[272] | CTTTAATGCGCGAACTGATAGCCCCACCAGTTGATCTACATA         |  | DNA-PAINT docking site |
|                |                                                    |  |                        |
| 4[63]6[56]     | Biotin-ATAAGGGAACCGGATATTCATTACGTCAGGACGTTGGGAA    |  | 5'-Biotin modification |
| 4[127]6[120]   | Biotin-TTGTGTCGTGACGAGAAACACCAATTTCAACTTTAAT       |  | 5'-Biotin modification |
| 4[191]6[184]   | Biotin-CACCCCTCAGAAACCATCGATAGCATTGAGCCATTTGGGAA   |  | 5'-Biotin modification |
| 4[255]6[248]   | Biotin-AGCCACCCTGTAGCGGTTTTCAAGGGAGGGAAGGTAAA      |  | 5'-Biotin modification |
| 18[63]20[56]   | Biotin-ATTAAGTTTACCGAGCTCGAATTCGGGAAACCTGTCGTGC    |  | 5'-Biotin modification |
| 18[127]20[120] | Biotin-GCGATCGGCAATTCACACAACAGGTGCCTAATGAGTG       |  | 5'-Biotin modification |
| 18[191]20[184] | Biotin-ATTCATTTTTGTTGGATTATACTAAGAAACCACCAGAAG     |  | 5'-Biotin modification |
| 18[255]20[248] | Biotin-AACAATAACGTAAAACAGAAATAAAAATCCTTTGCCCGAA    |  | 5'-Biotin modification |
|                |                                                    |  |                        |
| 1[64]4[64]     | TTTATCAGGACAGCATCGGAACGACACCAACCTAAAACGAGGTCAATC   |  | Structure strand       |
| 1[128]4[128]   | TGACAACCTCGCTGAGGCTTGCAATTATACCAAGCGCATGATAAA      |  | Structure strand       |
| 1[192]4[192]   | GCGGATAACCTATTATCTGAAACAGACGATTGGCCTTGAAGAGCCAC    |  | Structure strand       |
| 1[256]4[256]   | CAGGAGGTGGGGTCAGTGCCTTGAGTCTCTGAATTTACCGGGAACCAG   |  | Structure strand       |
| 15[64]18[64]   | GTATAAGCCAACCCGTCGGATTCTGACGACAGTATCGGCCGCAAGGCG   |  | Structure strand       |
| 15[128]18[128] | TAAATCAAATAATTCGCGTCTCGGAAACCAGGCAAAGGGAAGG        |  | Structure strand       |
| 15[192]18[192] | TCAAATATAACCTCCGGCTTAGGTAACAATTTCAATTTGAAGGCGAATT  |  | Structure strand       |
| 15[256]18[256] | GTGATAAAAAGACGCTGAGAAGAGATAACCTTGCTTCTGTTCCGGAGA   |  | Structure strand       |

**Table S3 | Staple sequences for DNA origami structures for 10-“color” *in vitro* Exchange-PAINT demonstration (odd digits).**

| Position       | Sequence                                   | Color | Description (number) |
|----------------|--------------------------------------------|-------|----------------------|
| 0[111]1[95]    | AAGGAATGCGAATAATAATTTTTGTGCGCTGA           |       | 5,9                  |
| 0[143]1[127]   | TCAGCGGAGTGAGAATAGAAAGGTTTTGCGG            |       | 5,9                  |
| 0[175]0[144]   | TATGGGATTTTGCTAAACAACCTTCAACAGTT           |       | 5,9                  |
| 0[79]1[63]     | GAAAATCTCCAAAAAAGGCTCCAACCATCG             |       | 5,9                  |
| 1[160]2[144]   | GGTGTATCTTGATATAAGTATAGCGACAGCAT           |       | 5,9                  |
| 2[47]0[48]     | TACGAAGGCCGCCGACAATGACAACAAAAGGAG          |       | 5,9                  |
| 3[160]4[144]   | AAAGCGCAAAATCCTCATTAAAGCGGTCAATC           |       | 5,9                  |
| 5[160]6[144]   | GCGTCAGAGCGACAGAATCAAGTTGTCAGGAC           |       | 5,9                  |
| 7[160]8[144]   | CGGAATAATATAAAAAGAAACGCAAGGAATCGT          |       | 5,9                  |
| 10[271]8[272]  | AGAAACGATTTAAGAAAAGTAAGCGAGGAA             |       | 3,5,9                |
| 11[160]12[144] | TGCGGGAGGGCGTTTTAGCGAACCCAATAAAG           |       | 3,5,9                |
| 12[271]10[272] | AGAACAAGCCTAATTTGCCAGTTCCAAATA             |       | 3,5,9                |
| 13[160]14[144] | AATGCAGACGACAATAAACACATGTCATTGC            |       | 3,5,9                |
| 14[271]12[272] | TATTTAACTGTCTTTCCTTATCACTCATCG             |       | 3,5,9                |
| 15[160]16[144] | TTGAAATAATCTTCTGACCTAAATCAACCCGT           |       | 3,5,9                |
| 16[271]14[272] | GGCTTAGGTTCTTACCAGTATAAATCGCCA             |       | 3,5,9                |
| 17[160]18[144] | GTGAGTGAGAAACAGTACATAAATGCAAGGCG           |       | 3,5,9                |
| 18[271]16[272] | TATTCATTTCAATAGTGAATTTAAACCTCC             |       | 3,5,9                |
| 19[160]20[144] | TATTTGCAGGTAGAACCTACCATGGGAAACC            |       | 3,5,9                |
| 2[271]0[272]   | TTCTGAAAAGCCCAATAGGAACCACAACT              |       | 3,5,9                |
| 20[271]18[272] | CACCAGAACGGATTTCGCTGATTGCGGAAT             |       | 3,5,9                |
| 21[160]22[144] | CAACTAATCTAAAATATCTTTAGGGAGTCCAC           |       | 3,5,9                |
| 22[271]20[272] | AAAAATCTCGTTATTAATTTTAAAAGAAAC             |       | 3,5,9                |
| 4[271]2[272]   | CCACCCTCGTAACAGTGCCCGTACCTATTA             |       | 3,5,9                |
| 6[271]4[272]   | ATTTGGGACCGGAACCGCCTCCAGAGCCA              |       | 3,5,9                |
| 8[271]6[272]   | ACGCAATATATGACGGAAATATTTGAGCC              |       | 3,5,9                |
| 9[160]10[144]  | TTGAGCGCACCTGAACAAAGTCAAGAGCTTA            |       | 3,5,9                |
| 0[47]1[31]     | CCTTTAATTGTATCGGTTTATCATGATACCG            |       | 3,5,7,9              |
| 1[32]3[31]     | ATAGTTGCACCAACCTAAAACGCTTTGACC             |       | 3,5,7,9              |
| 11[32]13[31]   | TTTAGCTAACCCCTCATATATTTGATTCAAA            |       | 3,5,7,9              |
| 13[32]15[31]   | AGGGTGAGGAAGATTGTATAAGTTAAAATT             |       | 3,5,7,9              |
| 15[32]17[31]   | CGCATTAGACGACAGTATCGGCGCACCGCT             |       | 3,5,7,9              |
| 17[32]19[31]   | TCTGGTGTACCGAGCTCGAATTAATTGTTA             |       | 3,5,7,9              |
| 19[32]21[31]   | TCCGCTCAGCTGATTGCCCTTCGTCCACGC             |       | 3,5,7,9              |
| 3[32]5[31]     | CCCAGCGACCGATATTCATTATGAATAAG              |       | 3,5,7,9              |
| 5[32]7[31]     | GCTTGCCATGCAGATACATAACACACTATC             |       | 3,5,7,9              |
| 7[32]9[31]     | ATAACCAAGCAAAGCGGATTGTTCAAATA              |       | 3,5,7,9              |
| 9[32]11[31]    | TCGCGTTAACGAGTAGATTTAGATAACCTG             |       | 3,5,7,9              |
| 21[120]23[127] | TAGGGTTGAGTGTGAACTGGACTCCAACGACCTGAA       |       | 1,3,7,9              |
| 21[56]23[63]   | TCCTGTTTGTGATGGTGGACCATCACCCAAATCACGAGAAAG |       | 1,3,7,9              |
| 21[96]23[95]   | ATAAATCACCGTCTATCAGGGCGAGACATTCT           |       | 1,3,7,9              |



|                |                                                  |  |                  |
|----------------|--------------------------------------------------|--|------------------|
| 23[32]22[48]   | ACGGGGAAAGCCGCGAACGTGGAGTTTTTT                   |  | 1,3,7,9          |
| 23[64]22[80]   | GAAGGGAAACCAGTAATAAAAGGTGGCCCA                   |  | 1,3,7,9          |
| 23[96]22[112]  | GGCCAACAGAGATAGAACCCTTCTGTCAAAGG                 |  | 1,3,7,9          |
| 21[184]23[191] | ATAGATAATACATTTGTCAACAGTTGAAAGGAGCGCGAAC         |  | 1,3,5,7,9        |
| 21[224]23[223] | CAAACAAACCCCTCAATCAATATAAAAAATAC                 |  | 1,3,5,7,9        |
| 21[248]23[255] | AAATCCTTTGCCCGAAAAGCATCACCTTGCTAAAACAGA          |  | 1,3,5,7,9        |
| 21[32]23[31]   | TGGTTTGGGTGCCGTAAAGCACAGAGCTTG                   |  | 1,3,5,7,9        |
| 23[128]23[159] | AGCGTAAGAATACGTGGCACAGACAATATTT                  |  | 1,3,5,7,9        |
| 23[160]22[176] | TTGAATGGCTATTAGTCTTTAATATTGAGG                   |  | 1,3,5,7,9        |
| 23[192]22[208] | TGATAGCCCTAAAACATCGCCATTCTGGTCAG                 |  | 1,3,5,7,9        |
| 23[224]22[240] | CGAACGAACCACCAGCAGAAGATGAACCTCA                  |  | 1,3,5,7,9        |
| 23[256]22[272] | GGTGAGGCGGTCAAGTATTAACACGCAAATG                  |  | 1,3,5,7,9        |
| 2[111]0[112]   | TTGAGGACGGGAGTTAAAGGCCGCAACAACATA                |  | 9                |
| 2[79]0[80]     | TTCCATTATAACCGATATATTTCGTACGTT                   |  | 9                |
|                |                                                  |  |                  |
| 0[207]1[191]   | TCTTTCAGACGTTAGTAAATGAATTTAGTAC                  |  | Structure Staple |
| 0[239]1[223]   | ATAGTTAGCGTAACGATCTAAAGCAGAACCG                  |  | Structure Staple |
| 0[271]1[255]   | ACAACGCCTGTAGCATCCACAGAATTTTCAG                  |  | Structure Staple |
| 1[128]4[128]   | GATCGTCGGGTAGCAACGGCTACCATGTTACTTAGCCACCGAAC     |  | Structure Staple |
| 1[192]4[192]   | CGCCACCAGTACCAGGCGGATAAGTTCAGTAAGCGTCAAGACGATT   |  | Structure Staple |
| 1[224]3[223]   | CCACCCTGAGAAGGATTAGGATATACAGGA                   |  | Structure Staple |
| 1[256]4[256]   | GGATAGCACATGAAAGTATTAAGAGGGTCAAGTGCCTTGAAGAGCCGC |  | Structure Staple |
| 1[64]4[64]     | CCCACGCAAACGGGTAAAATACGTAACAAAGTACAACGGAGCTGACCT |  | Structure Staple |
| 1[96]3[95]     | GGCTTGCATAAAGACTTTTTTCATGCTGATAAA                |  | Structure Staple |
| 10[111]8[112]  | TTTTAAATACCTTTAATTGCTCCTTCAAATGC                 |  | Structure Staple |
| 10[143]9[159]  | ATTGCTGATTTTTGCGGATGGCTTGAGGGTAA                 |  | Structure Staple |
| 10[175]8[176]  | AACTGAACATAATATCAGAGAGATATAAAGG                  |  | Structure Staple |
| 10[207]8[208]  | AAAACAGGGTTAAGCCCAATAATAGCAGTATG                 |  | Structure Staple |
| 10[239]8[240]  | AAATAGCAGAAATAGCAATAGCTAAAGAAGT                  |  | Structure Staple |
| 10[47]8[48]    | ATTCTGCGTTAATTCGAGCTTCAATGACTATT                 |  | Structure Staple |
| 10[79]8[80]    | GAAGTTTCAGCAAACCTCAACAGTGACCAT                   |  | Structure Staple |
| 11[128]13[127] | GGCAAAGCATAAAGCTAAATCGCTATTTTT                   |  | Structure Staple |
| 11[192]13[191] | TAGTTGCTAGAAGGCTTATCCGGTAACAATAG                 |  | Structure Staple |
| 11[224]13[223] | TCCTGAATACCGGCCCAATAGTATCCCAT                    |  | Structure Staple |
| 11[256]13[255] | TTCCAGAGCAAGCCGTTTTTATTTCCAATCAA                 |  | Structure Staple |
| 11[64]13[63]   | GAAAAGGTCTTTATTTCAACGCAATCAAATCA                 |  | Structure Staple |
| 11[96]13[95]   | TAGCATTATATGACCCGTAAACTCTAGCTG                   |  | Structure Staple |
| 12[111]10[112] | AAAAACATACATCCAATAAATCATTCAACATG                 |  | Structure Staple |
| 12[143]11[159] | CCTCAGAGAATTAGCAAAATTAAGTCCCGACT                 |  | Structure Staple |
| 12[175]10[176] | GAACGCGAGTTTGAAGCCTTAAGAGAATT                    |  | Structure Staple |
| 12[207]10[208] | TCAGATATATTTGCACCCAGCTAATAACATA                  |  | Structure Staple |
| 12[239]10[240] | GGAATCATCTTACCAACGCTAACAAAATGA                   |  | Structure Staple |
| 12[47]10[48]   | ATTTTTAGATATTTTCATTTGGGGGATTTCCCA                |  | Structure Staple |
| 12[79]10[80]   | GGAGAAGCGGCATCAATTCTACTGTGTCTG                   |  | Structure Staple |

|                |                                                  |  |                  |
|----------------|--------------------------------------------------|--|------------------|
| 13[128]15[127] | GAGAGATCTGGAGCAAACAAGAGCTTTCAT                   |  | Structure Staple |
| 13[192]15[191] | ATAAGTCCGACAAAAGGTAAAGTAATAAGGCC                 |  | Structure Staple |
| 13[224]15[223] | CCTAATTTTCGAGCCAGTAATAACATAATTA                  |  | Structure Staple |
| 13[256]15[255] | TAATCGGCAACGCCAACATGTAATATATGCGT                 |  | Structure Staple |
| 13[64]15[63]   | CCATCAATCCCAGTTGATAATCAGGCTCATT                  |  | Structure Staple |
| 13[96]15[95]   | ATAAATTAATCGTAAACTAGCATAAAATAAT                  |  | Structure Staple |
| 14[111]12[112] | GAACGGTAATGCCGGAGAGGGTAGGTTGTACC                 |  | Structure Staple |
| 14[143]13[159] | CTGAGAGTCTACAAAGGCTATCAGGTCAGCT                  |  | Structure Staple |
| 14[175]12[176] | CCAGACGAACGCGCCTGTTTATCATTTCTAA                  |  | Structure Staple |
| 14[207]12[208] | AAAGTACCTGAACAAGAAAAATAACAAGCAAA                 |  | Structure Staple |
| 14[239]12[240] | AGGCATTTTACGAGCATGTAGAAATCATCGTA                 |  | Structure Staple |
| 14[47]12[48]   | CAAAAACAGAAAGGCCGGAGACAGGGATAAAA                 |  | Structure Staple |
| 14[79]12[80]   | ATATGTACATGATATTC AACCGTTTTTGGC                  |  | Structure Staple |
| 15[128]18[128] | CAACATTCGGTGGGAACAAACGATTACGCCAGCTGGCGGGTAAC     |  | Structure Staple |
| 15[192]18[192] | TTAAATAAAAACCTTTTTCAAATATTAATCGTCGCTATTAACAATTT  |  | Structure Staple |
| 15[224]17[223] | CTAGAAACAAATCCAATCGCAAAATCCTTG                   |  | Structure Staple |
| 15[256]18[256] | TATACAAATTTGGTTATATACTAAAGACGCTGAGAAGAGTCAATTAC  |  | Structure Staple |
| 15[64]18[64]   | TTTAACCATCGTAACCGTGCATCTGCGCCATTCGCCATTCTGCCTGCA |  | Structure Staple |
| 15[96]17[95]   | TCGCGTCTGGGATAGGTCACGTTGTGGGAAGG                 |  | Structure Staple |
| 16[111]14[112] | ACCGTAATGGCTTCCTGTAGCCAGAATCGAT                  |  | Structure Staple |
| 16[143]15[159] | CGGATTCCTAAATGTGAGCGAGTAATTAATGGT                |  | Structure Staple |
| 16[175]14[176] | TTAATTTCCCGACCGTGTGATAAAATCTGT                   |  | Structure Staple |
| 16[207]14[208] | ACGCGAGAGAATAAACACCGGAATGAGAATAT                 |  | Structure Staple |
| 16[239]14[240] | TGCTGATGAAGCCTGTTTAGTATCTTAGGCAG                 |  | Structure Staple |
| 16[47]14[48]   | GAGGGGACAATTTTTGTAAATCAAAAAGCCC                  |  | Structure Staple |
| 16[79]14[80]   | TGGGCGCAATAGGAACGCCATCAGTCAATC                   |  | Structure Staple |
| 17[224]19[223] | AAAACATAAACATCAAGAAAACAGATGAAT                   |  | Structure Staple |
| 17[96]19[95]   | GCGATCGGTTGTAAAACGACGCCGGGTGCCCT                 |  | Structure Staple |
| 18[111]16[112] | TCACGACGTGCGGGCCTCTTCGCTGCGGATTG                 |  | Structure Staple |
| 18[143]17[159] | ATTAAGTTGAAAGGGGATGTGCTCAATATAT                  |  | Structure Staple |
| 18[175]16[176] | TTTTAATGATAACCTTGCTTCTGATTTTAG                   |  | Structure Staple |
| 18[207]16[208] | TTACATTTATTAATTTTCCCTTAGGACAAAGA                 |  | Structure Staple |
| 18[239]16[240] | GATGAAACAGCGATAGCTTAGATTTATGTAAA                 |  | Structure Staple |
| 18[47]16[48]   | TCCCCGGGCCGAAACCAGGCAAAGCCAGTTT                  |  | Structure Staple |
| 18[79]16[80]   | AGCTTGCAAGGCTGCGCAACTGTGTGTAGA                   |  | Structure Staple |
| 19[224]21[223] | ATACAGTAGATGATGGCAATTCAGACTTTA                   |  | Structure Staple |
| 19[96]21[95]   | AATGAGTGGGAGAGCGGTTTTCGGAATCCCTT                 |  | Structure Staple |
| 2[143]1[159]   | CGGAACGAACCTCAGCAGCGAAACCGGAATA                  |  | Structure Staple |
| 2[175]0[176]   | CGAGAGGGACCGTACTCAGGAGGTTTCTG                    |  | Structure Staple |
| 2[207]0[208]   | TTTTGCTCTCAGAACCGCCACCCTTTTTGTCCG                |  | Structure Staple |
| 2[239]0[240]   | CTCCTCAACAGAGCCACCACCCTCCAGCCCTC                 |  | Structure Staple |
| 20[111]18[112] | ACGCGCGGAGCTAACTCACATTAATTTCCAG                  |  | Structure Staple |
| 20[143]19[159] | TGTCGTGCTGCCCGCTTCCAGTCATCAAAAT                  |  | Structure Staple |
| 20[175]18[176] | AATGGAAGCGTAAAACAGAAATATTACCTT                   |  | Structure Staple |

|                |                                          |  |                  |
|----------------|------------------------------------------|--|------------------|
| 20[207]18[208] | AATCCTGATTTTCAGGTTAACGTCAAATTA           |  | Structure Staple |
| 20[239]18[240] | TGATTATCAACAGTACCTTTTACAAAGAAGAT         |  | Structure Staple |
| 20[47]18[48]   | CGGGCAACACAATCCACACAACACTAGAGGA          |  | Structure Staple |
| 20[79]18[80]   | CGCCAGGGAAAGTGTAAGCCTGAGTGCCA            |  | Structure Staple |
| 22[111]20[112] | GCGAAAAAAGAATAGCCCGAGAATCGGCCA           |  | Structure Staple |
| 22[143]21[159] | TATTAAAGTTCAGTTTGGAAACAAGCACTAA          |  | Structure Staple |
| 22[175]20[176] | AAGGTTATAGATTAGAGCCGTATCTGAAT            |  | Structure Staple |
| 22[207]20[208] | TTGGCAAAGGATTTAGAAGTATTATCAATAT          |  | Structure Staple |
| 22[239]20[240] | AATATCAATTCGACAACCTCGTATTCATATCC         |  | Structure Staple |
| 22[47]20[48]   | GGGGTCGACCCAGCAGGCGAAAACAGTGAGA          |  | Structure Staple |
| 22[79]20[80]   | CTACGTGATTCGAAATCGGCAATATGGG             |  | Structure Staple |
| 3[224]5[223]   | GTGTACTCGCCAGCATTGACAGCGTTTGCC           |  | Structure Staple |
| 3[96]5[95]     | TTGTGTCGTGAACGGTGTACAGACTAATTTCA         |  | Structure Staple |
| 4[111]2[112]   | AGGACAGAAAATCCGCGACCTGCTCAGAGGCT         |  | Structure Staple |
| 4[143]3[159]   | ATAAGGGAGGAACGAGGCGCAGACCAGAATGG         |  | Structure Staple |
| 4[175]2[176]   | AAACAAATGTCTCTGAATTTACCGTGCCGT           |  | Structure Staple |
| 4[207]2[208]   | GGCAGGTCTACATGGCTTTTGATGTAGCGGGG         |  | Structure Staple |
| 4[239]2[240]   | AGAGCCGCGTAATAAGTTTTAACGGCTGAGA          |  | Structure Staple |
| 4[47]2[48]     | TGACAAGAATTATACCAAGCGCGAAATGCCAC         |  | Structure Staple |
| 4[79]2[80]     | ATAGGCTGGATTTGTATCATCGCAGGAAGT           |  | Structure Staple |
| 5[224]7[223]   | ATCTTTTACCATTAGCAAGGCCAAAGACA            |  | Structure Staple |
| 5[96]7[95]     | ACTTTAATGAACAACATTTATTACAAAAGAAG         |  | Structure Staple |
| 6[111]4[112]   | AACTAACGCATTGTGAATTACCTTTTTGAAAG         |  | Structure Staple |
| 6[143]5[159]   | GTTGGAACTGGCTCATTTATACCATGCCTTTA         |  | Structure Staple |
| 6[175]4[176]   | AATCAGTACTGTAGCGGTTTTCTATTCAC            |  | Structure Staple |
| 6[207]4[208]   | TCACCAATATAGCCCCCTTATTAGGAGGTTGA         |  | Structure Staple |
| 6[239]4[240]   | AGCACCATCATAATCAAATCACCACCACCACC         |  | Structure Staple |
| 6[47]4[48]     | TTCAACTACTGACGAGAAACCAAGTAATCT           |  | Structure Staple |
| 6[79]4[80]     | AGATTTCATGGGCTTGAGATGGTTCAGGCGC          |  | Structure Staple |
| 7[120]9[127]   | AATGTTTAGACTGGATTCATTGAATCCCCCTTGATAA    |  | Structure Staple |
| 7[184]9[191]   | ATCAATAGAAAATTCACGTAGAAAATACATACAACCCACA |  | Structure Staple |
| 7[224]9[223]   | AAAGGGCAAGACTCCTTATTACAGAGCAAG           |  | Structure Staple |
| 7[248]9[255]   | AGGGAGGGAAGGTAATAACGGAATACCCAATCTTACCG   |  | Structure Staple |
| 7[56]9[63]     | GATAAAAACAAAATAAATCAGGTCTTTACCCAGCGAACC  |  | Structure Staple |
| 7[96]9[95]     | TTTTGCCAGTTCAGAAAACGAGAAGTCAGGAT         |  | Structure Staple |
| 8[111]6[112]   | TTTAAACAGAGGGGTAATAGTAAATAAAACG          |  | Structure Staple |
| 8[143]7[159]   | CATAAATATAGCGTCCAATACTGCAGACACCA         |  | Structure Staple |
| 8[175]6[176]   | TGGCAACAGTTTATTTTGTACAGCACCCT            |  | Structure Staple |
| 8[207]6[208]   | TTAGCAAATATGGTTTACCAGCGCCGAAACG          |  | Structure Staple |
| 8[239]6[240]   | GCATGATTGACATTCACCCGATTGTCACCAGT         |  | Structure Staple |
| 8[47]6[48]     | ATAGTCAGTCGTTTACCAGACGACATACCACA         |  | Structure Staple |
| 8[79]6[80]     | AAATCAAAGCGAGAGGCTTTTGCGGTAGAA           |  | Structure Staple |
| 9[128]11[127]  | GAGGTCAATATAATGCTGTAGCACAGGCAA           |  | Structure Staple |
| 9[192]11[191]  | AGAATTGAGAAGCGCATTAGACGGATCAAGAT         |  | Structure Staple |

|                |                                                  |  |                  |
|----------------|--------------------------------------------------|--|------------------|
| 9[224]11[223]  | AAACAATGCCTTTACAGAGAGACAATTTTA                   |  | Structure Staple |
| 9[256]11[255]  | AAGCCCTTTTTTTTGTTAACGTCGAGCGTCT                  |  | Structure Staple |
| 9[64]11[63]    | AGACCGAATTCATATAACAGTTCGCGAGCT                   |  | Structure Staple |
| 9[96]11[95]    | TAGAGAGTATGCAACTAAAGTACGAATAGTAG                 |  | Structure Staple |
|                |                                                  |  |                  |
| 4[63]6[56]     | Biotin-ATAAGGGAACCGGATATTCATTACGTCAGGACGTTGGGAA  |  | 5'-Biotin        |
| 4[127]6[120]   | Biotin-TTGTGTGTCGTGACGAGAAACACCAAATTTCAACTTTAAT  |  | 5'-Biotin        |
| 4[191]6[184]   | Biotin-CACCTCAGAAACCATCGATAGCATTGAGCCATTTGGGAA   |  | 5'-Biotin        |
| 4[255]6[248]   | Biotin-AGCCACCCTGTAGCGCTTTTCAAGGGAGGGAAGGTAA     |  | 5'-Biotin        |
| 18[63]20[56]   | Biotin-ATTAAGTTTACCGAGCTCGAATTCGGGAAACCTGTCGTGC  |  | 5'-Biotin        |
| 18[127]20[120] | Biotin-GCGATCGGCAATTCACACAACAGGTGCCAATGAGTG      |  | 5'-Biotin        |
| 18[191]20[184] | Biotin-ATTCATTTTTGTTTTGGATTATACTAAGAAACCACCAGAAG |  | 5'-Biotin        |
| 18[255]20[248] | Biotin-AACAATAACGTAAACAGAAATAAAATCCTTTGCCCGAA    |  | 5'-Biotin        |

**Table S4 | Staple sequences for DNA origami structures for 10-“color” *in vitro* Exchange-PAINT demonstration (even digits).**

| Position       | Sequence                                 | Color | Description (number) |
|----------------|------------------------------------------|-------|----------------------|
| 1[160]2[144]   | GGTGTATCTTGATATAAGTATAGCGACAGCAT         |       | 2,4,6,8              |
| 11[160]12[144] | TGCGGGAGGGCGTTTTAGCGAACCCAATAAAG         |       | 2,4,6,8              |
| 13[160]14[144] | AATGCAGACGACAATAAACAACATGTCATTGC         |       | 2,4,6,8              |
| 15[160]16[144] | TTGAAATAATCTTCTGACCTAAATCAACCCGT         |       | 2,4,6,8              |
| 17[160]18[144] | GTGAGTGAGAAACAGTACATAAATGCAAGGCG         |       | 2,4,6,8              |
| 19[160]20[144] | TATTTGCAGGTTAGAACCCTACCATGGGAAACC        |       | 2,4,6,8              |
| 21[160]22[144] | CAACTAATCTAAAATATCTTTAGGGAGTCCAC         |       | 2,4,6,8              |
| 3[160]4[144]   | AAAGCGCAAAATCCTCATTAAGCGGTCAATC          |       | 2,4,6,8              |
| 5[160]6[144]   | GCGTCAGAGCGACAGAATCAAGTTGTCAGGAC         |       | 2,4,6,8              |
| 7[160]8[144]   | CGGAATAATATAAAAGAAACGCAAGGAATCGT         |       | 2,4,6,8              |
| 9[160]10[144]  | TTGAGCGCACCTGAACAAAGTCAAGAGCTTA          |       | 2,4,6,8              |
| 21[224]23[223] | CAAACAAACCTCAATCAATATAAAAAATAC           |       | 0,4,8                |
| 21[248]23[255] | AAATCCTTTGCCCGAAAAGCATCACCTTGCTAAAACAGA  |       | 0,4,8                |
| 0[111]1[95]    | AAGGAATGCGAATAATAATTTTTGTGCGCTGA         |       | 0,4,6,8              |
| 0[143]1[127]   | TCAGCGGAGTGAGAATAGAAAGGTTTTGCGG          |       | 0,4,6,8              |
| 0[79]1[63]     | GAAAATCTCCAAAAAAGGCTCCAACCATCG           |       | 0,4,6,8              |
| 2[111]0[112]   | TTGAGGACGGGAGTTAAAGGCCGCAACAACATA        |       | 0,4,6,8              |
| 2[47]0[48]     | TACGAAGGCCCGACAATGACAACAAAAGGAG          |       | 0,4,6,8              |
| 2[79]0[80]     | TTCCATTATAACCGATATATTCGTCACGTT           |       | 0,4,6,8              |
| 21[184]23[191] | ATAGATAATACATTTGTCAACAGTTGAAAGGAGCGCGAAC |       | 0,4,6,8              |
| 23[160]22[176] | TTGAATGGCTATTAGTCTTTAATATTGAGG           |       | 0,4,6,8              |
| 23[192]22[208] | TGATAGCCCTAAAACATCGCCATTCTGGTTCAG        |       | 0,4,6,8              |
| 23[224]22[240] | CGAACGAACCACCAGCAGAAGATGAACCTCA          |       | 0,4,6,8              |
| 1[32]3[31]     | ATAGTTGCACCAACCTAAAACGCTTTGACC           |       | 0,2,8                |
| 11[32]13[31]   | TTTAGCTAACCTCATATATTGATTCAA              |       | 0,2,8                |
| 13[32]15[31]   | AGGGTGAGGAAGATTGTATAAGTTAAAATT           |       | 0,2,8                |

|                |                                                  |  |                  |
|----------------|--------------------------------------------------|--|------------------|
| 15[32]17[31]   | CGCATTAGACGACAGTATCGGCGCACCGCT                   |  | 0,2,8            |
| 17[32]19[31]   | TCTGGTGTACCGAGCTCGAATTAATTGTTA                   |  | 0,2,8            |
| 19[32]21[31]   | TCCGCTCAGCTGATTGCCCTTCGTCCACGC                   |  | 0,2,8            |
| 3[32]5[31]     | CCCAGCGACCGGATATTCATTATGAATAAG                   |  | 0,2,8            |
| 5[32]7[31]     | GCTTGCCATGCAGATACATAACACACTATC                   |  | 0,2,8            |
| 7[32]9[31]     | ATAACCCAAGCAAAGCGGATTGTTCAAATA                   |  | 0,2,8            |
| 9[32]11[31]    | TCGCGTTAACGAGTAGATTTAGATAACCTG                   |  | 0,2,8            |
| 0[207]1[191]   | TCTTCCAGACGTTAGTAAATGAATTTAGTAC                  |  | 0,2,6,8          |
| 0[239]1[223]   | ATAGTTAGCGTAACGATCTAAAGCAGAACCG                  |  | 0,2,6,8          |
| 0[271]1[255]   | ACAACGCCTGTAGCATTCCACAGAATTTTCAG                 |  | 0,2,6,8          |
| 10[271]8[272]  | AGAAACGATTTAAGAAAAGTAAGCGAGGAA                   |  | 0,2,6,8          |
| 12[271]10[272] | AGAACAAGCCTAATTTGCCAGTTCAAATA                    |  | 0,2,6,8          |
| 14[271]12[272] | TATTTAACTGTCTTTCCTTATCACTCATCG                   |  | 0,2,6,8          |
| 16[271]14[272] | GGCTTAGGTTCTTACCAGTATAAATCGCCA                   |  | 0,2,6,8          |
| 18[271]16[272] | TATTCATTTCAATAGTGAATTTAAACCTCC                   |  | 0,2,6,8          |
| 2[175]0[176]   | CGAGAGGGACCGTACTCAGGAGGTTTTCTG                   |  | 0,2,6,8          |
| 2[207]0[208]   | TTTTGCTCTCAGAACCGCCACCCTTTTTGTGC                 |  | 0,2,6,8          |
| 2[239]0[240]   | CTCCTCAACAGAGCCACCACCCTCCAGCCCTC                 |  | 0,2,6,8          |
| 2[271]0[272]   | TTCTGAAAAGCCCAATAGGAACCACAACT                    |  | 0,2,6,8          |
| 20[271]18[272] | CACCAGAACGGATTTCGCCTGATTGGCGAAT                  |  | 0,2,6,8          |
| 22[271]20[272] | AAAAATCTCGTTATTAATTTTAAAAGAAAC                   |  | 0,2,6,8          |
| 4[271]2[272]   | CCACCCTCGTAAACAGTGCCCGTACCTATTA                  |  | 0,2,6,8          |
| 6[271]4[272]   | ATTTGGGACCGGAACCGCCTCCAGAGCCA                    |  | 0,2,6,8          |
| 8[271]6[272]   | ACGCAATATATTGACGGAAATTATTGAGCC                   |  | 0,2,6,8          |
| 21[32]23[31]   | TGGTTTGGGTGCCGTAAGCACAGAGCTTG                    |  | 0,2,4,8          |
| 21[56]23[63]   | TCCTGTTTGATGGTGGACCATCACCCAAATCACGAGAAAG         |  | 0,2,4,8          |
| 21[96]23[95]   | ATAAATCACCGTCTATCAGGGCGAGACATTCT                 |  | 0,2,4,8          |
| 23[32]22[48]   | ACGGGAAAGCCGGCGAACGTGGAGTTTTTT                   |  | 0,2,4,8          |
| 23[64]22[80]   | GAAGGGAAACCAGTAATAAAAGGTGGCCCA                   |  | 0,2,4,8          |
| 23[96]22[112]  | GGCCAACAGAGATAGAACCCTTCTGTCAAAGG                 |  | 0,2,4,8          |
| 0[175]0[144]   | TATGGGATTTTGCTAAACAACTTTCAACAGTT                 |  | 0,2,4,6,8        |
| 0[47]1[31]     | CCTTTAATTGTATCGGTTTATCATGATACCG                  |  | 0,2,4,6,8        |
| 23[128]23[159] | AGCGTAAGAATACGTGGCACAGACAATATTT                  |  | 0,2,4,6,8        |
| 23[256]22[272] | GGTGAGGCGGTCAGTATTAACACGCAAATG                   |  | 0,2,4,6,8        |
| 21[120]23[127] | TAGGGTTGAGTGTGAACGTGGACTCCAACGACCTGAA            |  | 0,2,4            |
|                |                                                  |  |                  |
| 1[128]4[128]   | GATCGTCGGGTAGCAACGGCTACCATGTTACTTAGCCACCGAAC     |  | Structure Staple |
| 1[192]4[192]   | CGCCACCCAGTACCAGGCGGATAAGTTCCAGTAAGCGTCAAGACGATT |  | Structure Staple |
| 1[224]3[223]   | CCACCCTGAGAAGGATTAGGATATACAGGA                   |  | Structure Staple |
| 1[256]4[256]   | GGATAGCACATGAAAGTATTAAGAGGGGTCAGTGCCTTGAAGAGCCGC |  | Structure Staple |
| 1[64]4[64]     | CCCACGCAAACGGGTAAAATACGTAACAAAGTACAACGGAGCTGACCT |  | Structure Staple |
| 1[96]3[95]     | GGCTTGCATAAAGACTTTTTCATGCTGATAAA                 |  | Structure Staple |
| 10[111]8[112]  | TTTTAAATACCTTAAATGCTCCTTCAAATGC                  |  | Structure Staple |
| 10[143]9[159]  | ATTGCTGATTTTTGCGGATGGCTTGAGGGTAA                 |  | Structure Staple |

|                |                                                   |  |                  |
|----------------|---------------------------------------------------|--|------------------|
| 10[175]8[176]  | AACTGAACTAATATCAGAGAGATATAAAGG                    |  | Structure Staple |
| 10[207]8[208]  | AAAACAGGGTTAAGCCCAATAATAGCAGTATG                  |  | Structure Staple |
| 10[239]8[240]  | AAATAGCAGAAATAGCAATAGCTAAAGAACTG                  |  | Structure Staple |
| 10[47]8[48]    | ATTCTGCGTTAATTCGAGCTTCAATGACTATT                  |  | Structure Staple |
| 10[79]8[80]    | GAAGTTTCAGCAAACCTCCAACAGTGACCAT                   |  | Structure Staple |
| 11[128]13[127] | GGCAAAGCATAAAGCTAAATCGCTATTTTT                    |  | Structure Staple |
| 11[192]13[191] | TAGTTGCTAGAAGGCTTATCCGGTAACAATAG                  |  | Structure Staple |
| 11[224]13[223] | TCCTGAATACCGCGCCCAATAGTATCCCAT                    |  | Structure Staple |
| 11[256]13[255] | TTCCAGAGCAAGCCGTTTTTATTTCCAATCAA                  |  | Structure Staple |
| 11[64]13[63]   | GAAAAGGTCTTTATTTCAACGCAATCAAATCA                  |  | Structure Staple |
| 11[96]13[95]   | TAGCATATATGACCCGTAAATACTCTAGCTG                   |  | Structure Staple |
| 12[111]10[112] | AAAAACATACATCCAATAAATCATTCAACATG                  |  | Structure Staple |
| 12[143]11[159] | CCTCAGAGAATTAGCAAAATTAAGTCCCGACT                  |  | Structure Staple |
| 12[175]10[176] | GAACGCGAGTTTTGAAGCCTTAAGAGAATT                    |  | Structure Staple |
| 12[207]10[208] | TCAGATATATTTGCACCCAGCTAATAACATA                   |  | Structure Staple |
| 12[239]10[240] | GGAATCATCTTACCAACGCTAACAAAAATGA                   |  | Structure Staple |
| 12[47]10[48]   | ATTTTTAGATATTTTCATTTGGGGGATCCCA                   |  | Structure Staple |
| 12[79]10[80]   | GGAGAAGCGGCATCAATTCTACTGTGTCTG                    |  | Structure Staple |
| 13[128]15[127] | GAGAGATCTGGAGCAAACAAGAGCTTTCAT                    |  | Structure Staple |
| 13[192]15[191] | ATAAGTCCGACAAAAGGTAAGTAATAAGGCG                   |  | Structure Staple |
| 13[224]15[223] | CCTAATTCGAGCCAGTAATAACATAATTA                     |  | Structure Staple |
| 13[256]15[255] | TAATCGGCAACGCCAACATGTAATATATGCGT                  |  | Structure Staple |
| 13[64]15[63]   | CCATCAATCCCGGTTGATAATCAGGCTCATTT                  |  | Structure Staple |
| 13[96]15[95]   | ATAAATTAATCGTAAACTAGCATAAAATAAT                   |  | Structure Staple |
| 14[111]12[112] | GAACGGTAATGCGGAGAGGGTAGGTGTACC                    |  | Structure Staple |
| 14[143]13[159] | CTGAGAGTCTACAAAGGCTATCAGGTTACGCT                  |  | Structure Staple |
| 14[175]12[176] | CCAGACGAACGCGCCTGTTTATCATCTTAA                    |  | Structure Staple |
| 14[207]12[208] | AAAGTACCTGAACAAGAAAAATAACAAGCAAA                  |  | Structure Staple |
| 14[239]12[240] | AGGCATTTTACGAGCATGTAGAAATCATCGTA                  |  | Structure Staple |
| 14[47]12[48]   | CAAAAACAGAAAGGCCGAGACAGGGATAAAA                   |  | Structure Staple |
| 14[79]12[80]   | ATATGTACATGATATTC AACCGTTTTTGCG                   |  | Structure Staple |
| 15[128]18[128] | CAACATCCGTGGGAACAAACGATTACGCCAGCTGGCGGTAAC        |  | Structure Staple |
| 15[192]18[192] | TTAAATAAAAACTTTTTCAAATATTAATCGTCGCTATTAACAATTT    |  | Structure Staple |
| 15[224]17[223] | CTAGAAACAAATCCAATCGCAAATCCTTG                     |  | Structure Staple |
| 15[256]18[256] | TATACAAATGGGTTATATAACTAAAGACGCTGAGAAGAGTCAATTAC   |  | Structure Staple |
| 15[64]18[64]   | TTTAACCATCGTAACCGTGCACTCTGCGCCATTCGCCATTCTGCCTGCA |  | Structure Staple |
| 15[96]17[95]   | TCGCGTCTGGGATAGGTCACGTTGTGGGAAGG                  |  | Structure Staple |
| 16[111]14[112] | ACCGTAATGGCCTTCTGTAGCCAGAATCGAT                   |  | Structure Staple |
| 16[143]15[159] | CGGATTCTAAATGTGAGCGAGTAATTAATGGT                  |  | Structure Staple |
| 16[175]14[176] | TTAATTTCCCGACCGTGTGATAAATCTGT                     |  | Structure Staple |
| 16[207]14[208] | ACGCGAGAGAATAAACACCGGAATGAGAATAT                  |  | Structure Staple |
| 16[239]14[240] | TGCTGATGAAGCCTGTTAGTATCTTAGGCAG                   |  | Structure Staple |
| 16[47]14[48]   | GAGGGGACAATTTTTGTAAATCAAAAAGCCG                   |  | Structure Staple |
| 16[79]14[80]   | TGGGCGCAATAGGAACGCCATCAGTCAATC                    |  | Structure Staple |

|                |                                   |  |                  |
|----------------|-----------------------------------|--|------------------|
| 17[224]19[223] | AAAACATAAACATCAAGAAAACAGATGAAT    |  | Structure Staple |
| 17[96]19[95]   | GCGATCGGTTGTAAAACGACGGCCGGGTGCCCT |  | Structure Staple |
| 18[111]16[112] | TCACGACGTGCGGGCCTCTTCGCTGCGGATTG  |  | Structure Staple |
| 18[143]17[159] | ATTAAGTTGAAAGGGGATGTGCTCAATATAT   |  | Structure Staple |
| 18[175]16[176] | TTTTAATGATAACCTTGCTTCTGATTTTAG    |  | Structure Staple |
| 18[207]16[208] | TTACATTTATTAATTTTCCCTTAGGACAAAGA  |  | Structure Staple |
| 18[239]16[240] | GATGAAACAGCGATAGCTTAGATTTATGTAAA  |  | Structure Staple |
| 18[47]16[48]   | TCCCCGGGCCGGAAACCAGGCAAGCCAGTTT   |  | Structure Staple |
| 18[79]16[80]   | AGCTTGCAAGGCTGCGCAACTGTGTGTAGA    |  | Structure Staple |
| 19[224]21[223] | ATACAGTAGATGATGGCAATTCAGACTTTA    |  | Structure Staple |
| 19[96]21[95]   | AATGAGTGGGAGAGCGGTTTGCGAATCCCTT   |  | Structure Staple |
| 2[143]1[159]   | CGGAACGAACCTCAGCAGCGAAACCGGAATA   |  | Structure Staple |
| 20[111]18[112] | ACGCGCGGAGCTAACTCACATTAATTTCCAG   |  | Structure Staple |
| 20[143]19[159] | TGTCTGCTGCCCGCTTTCAGTCATCAAAAT    |  | Structure Staple |
| 20[175]18[176] | AATGGAAGCGTAAAACAGAAATATTACCTT    |  | Structure Staple |
| 20[207]18[208] | AATCCTGATTTACAGTTTAAACGTCAAAATTAA |  | Structure Staple |
| 20[239]18[240] | TGATTATCAACAGTACCTTTTACAAAGAAGAT  |  | Structure Staple |
| 20[47]18[48]   | CGGGCAACACAATTCCACACAACACTAGAGGA  |  | Structure Staple |
| 20[79]18[80]   | CGCCAGGGAAAGTGTAAAGCCTGAGTGCCA    |  | Structure Staple |
| 22[111]20[112] | GCGAAAAAAAAGAAATAGCCCGAGAATCGGCCA |  | Structure Staple |
| 22[143]21[159] | TATTAAAGTTCAGTTTGAACAAGCACTAA     |  | Structure Staple |
| 22[175]20[176] | AAGGTTATAGATTAGAGCCGTCATCTGAAT    |  | Structure Staple |
| 22[207]20[208] | TTGGCAAAGGATTTAGAAGTATTATCAATAT   |  | Structure Staple |
| 22[239]20[240] | AATATCAATTCGACAACCTCGTATTCATATCC  |  | Structure Staple |
| 22[47]20[48]   | GGGGTCGACCCAGCAGGCGAAAACAGTGAGA   |  | Structure Staple |
| 22[79]20[80]   | CTACGTGATTCCGAAATCGGCAATATTGGG    |  | Structure Staple |
| 3[224]5[223]   | GTGTACTCGCCAGCATTGACAGCGTTTGCC    |  | Structure Staple |
| 3[96]5[95]     | TTGTGTCTGTAACGGGTACAGACTAATTTCA   |  | Structure Staple |
| 4[111]2[112]   | AGGACAGAAAATCCGCGACCTGCTCAGAGGCT  |  | Structure Staple |
| 4[143]3[159]   | ATAAGGGAGGAACGAGGCGCAGACCAGAATGG  |  | Structure Staple |
| 4[175]2[176]   | AAACAAATGCTCTGAAATTTACCGTGCCGT    |  | Structure Staple |
| 4[207]2[208]   | GGCAGGTCTACATGGCTTTTGTGTAGCGGGG   |  | Structure Staple |
| 4[239]2[240]   | AGAGCCCGGTAATAAGTTTTAACGGCTGAGA   |  | Structure Staple |
| 4[47]2[48]     | TGACAAGAATTATACCAAGCGGAAATGCCAC   |  | Structure Staple |
| 4[79]2[80]     | ATAGGCTGGATTGTATCATCGCAGGAAGT     |  | Structure Staple |
| 5[224]7[223]   | ATCTTTTTACCATTAGCAAGGCCAAAGACA    |  | Structure Staple |
| 5[96]7[95]     | ACTTTAATGAACAACATTATTACAAAAAGAAG  |  | Structure Staple |
| 6[111]4[112]   | AACTAACGCATTGTGAATTACCTTTTTGAAAG  |  | Structure Staple |
| 6[143]5[159]   | GTTGGGAAGTGGCTCATTATACCATGCCTTTA  |  | Structure Staple |
| 6[175]4[176]   | AATCAGTACTGTAGCGGTTTTCTATTACAC    |  | Structure Staple |
| 6[207]4[208]   | TCACCAATATAGCCCCCTTATTAGGAGGTTGA  |  | Structure Staple |
| 6[239]4[240]   | AGCACCATCATAATCAAAATCACCCACCACC   |  | Structure Staple |
| 6[47]4[48]     | TTCAACTACTGACGAGAAACACCAAGTAATCT  |  | Structure Staple |
| 6[79]4[80]     | AGATTCATGGGCTTGAGATGGTTCAGGCGC    |  | Structure Staple |

|                |                                                 |  |                  |
|----------------|-------------------------------------------------|--|------------------|
| 7[120]9[127]   | AATGTTTAGACTGGATTCATTGAATCCCCCTTGATAA           |  | Structure Staple |
| 7[184]9[191]   | ATCAATAGAAAATTCACGTAGAAAATACATACAACCCACA        |  | Structure Staple |
| 7[224]9[223]   | AAAGGGCAAGACTCCTTATTACAGAGCAAG                  |  | Structure Staple |
| 7[248]9[255]   | AGGGAGGGAAGGTAAAATAACGGAATACCCAATCTTACCG        |  | Structure Staple |
| 7[56]9[63]     | GATAAAAACCAAAATAAATCAGGTCTTTACCCAGCGAACC        |  | Structure Staple |
| 7[96]9[95]     | TTTTGCCAGTTCAGAAAACGAGAAGTCAGGAT                |  | Structure Staple |
| 8[111]6[112]   | TTTAAACAGAGGGGTAAATAGTAAATAAAACG                |  | Structure Staple |
| 8[143]7[159]   | CATAAATATAGCGTCCAATACTGCAGACACCA                |  | Structure Staple |
| 8[175]6[176]   | TGGCAACAGTTTATTTTGTCCAGCACCGT                   |  | Structure Staple |
| 8[207]6[208]   | TTAGCAAATATGGTTTACCAGCGCCGAAACG                 |  | Structure Staple |
| 8[239]6[240]   | GCATGATTGACATTC AACCGATTGTCACCAGT               |  | Structure Staple |
| 8[47]6[48]     | ATAGTCAGTCGTTTACCAGACGACATACCACA                |  | Structure Staple |
| 8[79]6[80]     | AAATCAAAGCGAGAGGCTTTTGCGGTAGAA                  |  | Structure Staple |
| 9[128]11[127]  | GAGGTCAATATAATGCTGTAGCACAGGCAA                  |  | Structure Staple |
| 9[192]11[191]  | AGAATTGAGAAGCGCATTAGACGGATCAAGAT                |  | Structure Staple |
| 9[224]11[223]  | AAACAATGCCTTTACAGAGAGACAATTTTA                  |  | Structure Staple |
| 9[256]11[255]  | AAGCCCTTTTTTTTGTTTAACGTCGAGCGTCT                |  | Structure Staple |
| 9[64]11[63]    | AGACCGGAATTCATATAACAGTTCGCGAGCT                 |  | Structure Staple |
| 9[96]11[95]    | TAGAGAGTATGCAACTAAAGTACGAATAGTAG                |  | Structure Staple |
|                |                                                 |  |                  |
| 4[63]6[56]     | Biotin-TCATCAAGGAACGAGTAGTAAATTCAGTTGAGATTTAGGA |  | 5'-Biotin        |
| 4[255]6[248]   | Biotin-CACCAGAAGGAACCAGAGCCACCAATTAGAGCCAGCAAAA |  | 5'-Biotin        |
| 4[191]6[184]   | Biotin-GGCCTTGAATCGGCATTTTCGGTCGAAACCATCGATAGCA |  | 5'-Biotin        |
| 4[127]6[120]   | Biotin-TGACCAACATGCGATTTTAAAGAAGAAAAATCTACGTTA  |  | 5'-Biotin        |
| 18[63]20[56]   | Biotin-GGTCGACTTACGAGCCGGAAGCATTGGTTTTTCTTTTCAC |  | 5'-Biotin        |
| 18[255]20[248] | Biotin-CTGAGCAATCGGGAGAAACAATAAGGAGCGGAATTATCAT |  | 5'-Biotin        |
| 18[191]20[184] | Biotin-CATTTGAAAAGAAATGCGTAGATTTGTTTGGATTATACT  |  | 5'-Biotin        |
| 18[127]20[120] | Biotin-GCCAGGGTTTGCCTGCGCTCACCAGCTGCATTAATGA    |  | 5'-Biotin        |



**Table S5 | Staple sequences for DNA origami structures for *in vitro* Exchange-PAINT demonstration (digits 0 to 3). (Only modified strands are listed)**

| Position       | Sequence                                     | Color | Description (number) |
|----------------|----------------------------------------------|-------|----------------------|
| 2[47]0[48]     | ACGGCTACAAAAGGAGCCTTTAATGTGAGAATTTATACATCTA  |       | 0                    |
| 2[79]0[80]     | CAGCGAAACTTGCTTTTCGAGGTGTTGCTAATTATACATCTA   |       | 0                    |
| 2[111]0[112]   | AAGGCCGCTGATACCGATAGTTGCGACGTTAGTTATACATCTA  |       | 0                    |
| 2[143]1[159]   | ATATTCGGAACCATCGCCACGCAGAGAAGGATTATACATCTA   |       | 0                    |
| 2[175]0[176]   | TATTAAGAAGCGGGGTTTTCGTCGTAGCATTATACATCTA     |       | 0                    |
| 2[207]0[208]   | TTTCGGAAGTGCCGTCGAGAGGGTGAGTTTCGTTATACATCTA  |       | 0                    |
| 2[239]0[240]   | GCCCGTATCCGGAATAGGTGTATCAGCCCAATTTATACATCTA  |       | 0                    |
| 6[47]4[48]     | TACGTTAAAGTAATCTTGACAAGAACCGAACCTTATACATCTA  |       | 0                    |
| 6[239]4[240]   | GAAATTTATGTCCTTTAGCGTCAGACCGGAACCTTATACATCTA |       | 0                    |
| 10[47]8[48]    | CTGTAGCTTGACTATTATAGTCAGTTCATTGATTATACATCTA  |       | 0                    |
| 10[239]8[240]  | GCCAGTTAGAGGTAATTGAGCGCTTTAAGAATTATACATCTA   |       | 0                    |
| 14[47]12[48]   | AACAAGAGGGATAAAAAATTTTAGCATAAAGCTTATACATCTA  |       | 0                    |
| 14[239]12[240] | AGTATAAAGTTCAGCTAATGCAGATGCTTTTCTTATACATCTA  |       | 0                    |
| 18[47]16[48]   | CCAGGGTTGCCAGTTTGAGGGGACCCGTGGGATTATACATCTA  |       | 0                    |
| 18[239]16[240] | CCTGATTGCAATATATGTGAGTGATCAATAGTTTATACATCTA  |       | 0                    |
| 22[47]20[48]   | CTCCAACGCAGTGAGACGGGCAACCAGCTGCATTATACATCTA  |       | 0                    |
| 22[79]20[80]   | TGGAACAACCGCCTGGCCCTGAGGCCCGCTTATACATCTA     |       | 0                    |
| 22[111]20[112] | GCCCGAGAGTCCACGCTGGTTTGCAGCTAACTTATACATCTA   |       | 0                    |
| 22[143]21[159] | TCGGCAAATCCTGTTTGTGTTGGACCTCAATTATACATCTA    |       | 0                    |
| 22[175]20[176] | ACCTTGCTTGGTCAGTTGGCAAAGAGCGGATTATACATCTA    |       | 0                    |
| 22[207]20[208] | AGCCAGCAATTGAGGAAGGTTATCATCTATTTTATACATCTA   |       | 0                    |
| 22[239]20[240] | TTAACACCAGCACTAACAACTAATCGTTATTATTATACATCTA  |       | 0                    |
| 9[64]11[63]    | CGGATTGCAGAGCTTAATTGCTGAAACGAGTATTATCTACATA  |       | 1                    |
| 9[96]11[95]    | CGAAAGACTTTGATAAGAGGTCATATTTTCGATTATCTACATA  |       | 1                    |
| 9[128]11[127]  | GCTTCAATCAGGATTAGAGAGTATTTTTCATTATCTACATA    |       | 1                    |
| 9[192]11[191]  | TTAGACGGCCAAATAAGAAACGATAGAAGGCTTATCTACATA   |       | 1                    |
| 9[224]11[223]  | AAAGTCACAAAATAAACAGCCAGCGTTTATATCTACATA      |       | 1                    |
| 9[256]11[255]  | GAGAGATAGAGCGTCTTCCAGAGGTTTGAATTATCTACATA    |       | 1                    |
| 11[64]13[63]   | GATTTAGTCAATAAAGCCTCAGAGAACCCTCATTATCTACATA  |       | 1                    |
| 11[96]13[95]   | AATGGTCAACAGGCAAGGCAAGAGTAATGTGTTATCTACATA   |       | 1                    |
| 11[128]13[127] | TTTGGGATAGTAGTAGCATTAAAAGCCGTTATCTACATA      |       | 1                    |
| 11[160]12[144] | CCAATAGCTCATCGTAGGAATCATGGCATCAATTATCTACATA  |       | 1                    |
| 11[192]13[191] | TATCCGGTCTCATCGAGAACAAGCGACAAAAGTTATCTACATA  |       | 1                    |
| 11[224]13[223] | GCGAACCTCCAAGAACGGGTATGACAATAATTATCTACATA    |       | 1                    |
| 11[256]13[255] | GCCTTAAACCAATCAATAATCGGCACGCGCTTATCTACATA    |       | 1                    |
| 12[47]10[48]   | TAAATCGGGATPCCCAATTCTGCGATATAATGTTATCTACATA  |       | 1                    |
| 12[79]10[80]   | AAATTAAGTTGACCATTAGATACTTTTTCGTTATCTACATA    |       | 1                    |
| 12[111]10[112] | TAAATCATATAACCTGTTTAGCTAACCTTTAATTATCTACATA  |       | 1                    |
| 12[175]10[176] | TTTTATTTAAGCAAATCAGATATTTTTTGTATCTACATA      |       | 1                    |
| 12[207]10[208] | GTACCGCAATTCTAAGAACGCGAGTATTTTTTATCTACATA    |       | 1                    |
| 12[239]10[240] | CTTATCATTTCCGACTTGCAGGAGCCTAATTTTTATCTACATA  |       | 1                    |

|                |                                                    |   |
|----------------|----------------------------------------------------|---|
| 13[160]14[144] | GTAATAAGTTAGGCAGAGGCATTTATGATATTTTATCTACATA        | 1 |
| 14[79]12[80]   | GCTATCAGAAATGCAATGCCTGAATTAGCATTATCTACATA          | 1 |
| 14[111]12[112] | GAGGGTAGGATTCAAAAGGGTGAGACATCCAATTATCTACATA        | 1 |
| 14[175]12[176] | CATGTAATAGAATATAAAGTACCAAGCCGTTTATCTACATA          | 1 |
| 14[207]12[208] | AATTGAGAATTCTGTCCAGACGACTAAACCAATTATCTACATA        | 1 |
| 0[175]0[144]   | TCCACAGACAGCCCTCATAGTTAGCGTAACGATTTCTTCATTA        | 2 |
| 0[207]1[191]   | TCACCAGTACAACTACAACGCCTAGTACCAGTTTCTTCATTA         | 2 |
| 0[239]1[223]   | AGGAACCCATGTACCGTAACACTTGATATAATTTCTTCATTA         | 2 |
| 0[271]1[255]   | CCACCCTCATTTTCAGGGATAGCAACCGTACTTTTCTTCATTA        | 2 |
| 1[32]3[31]     | AGGCTCCAGAGGCTTTGAGGACACGGTAATTTCTTCATTA           | 2 |
| 4[143]3[159]   | TCATCGCCAACAAGTACAACGGACGCCAGCATTTCTTCATTA         | 2 |
| 4[271]2[272]   | AAATCACCTTCCAGTAAGCGTCAGTAATAATTTCTTCATTA          | 2 |
| 5[32]7[31]     | CATCAAGTAAAACGAACTAACGAGTTGAGATTTCTTCATTA          | 2 |
| 8[143]7[159]   | CTTTTGCAGATAAAAACCAAAATAAAGACTCCTTTCTTCATTA        | 2 |
| 8[271]6[272]   | AATAGCTATCAATAGAAAATTCAACATTCATTTCTTCATTA          | 2 |
| 9[32]11[31]    | TTTACCCCAACATGTTTTAAATTTCCATATTTTCTTCATTA          | 2 |
| 12[143]11[159] | TTCTACTACGGAGCTGAAAAGTTACCGCGCTTTCTTCATTA          | 2 |
| 12[271]10[272] | TGTAGAAATCAAGATTAGTTGCTCTTACCATTCTTCATTA           | 2 |
| 13[32]15[31]   | AACGCAAAATCGATGAACGGTACCGGTTGATTTCTTCATTA          | 2 |
| 16[143]15[159] | GCCATCAAGCTCATTTTTTAACCACAAATCCATTTCTTCATTA        | 2 |
| 16[271]14[272] | CTTAGATTTAAGGCGTTAAATAAAGCCTGTTTTCTTCATTA          | 2 |
| 17[32]19[31]   | TGCATCTTTCCAGTCACGACGGCCTGCAGTTTCTTCATTA           | 2 |
| 20[143]19[159] | AAGCCTGGTACGAGCCGGAAGCATAGATGATGTTCTTCATTA         | 2 |
| 20[271]18[272] | CTCGTATTAGAAATTGCGTAGATACAGTACTTTCTTCATTA          | 2 |
| 21[32]23[31]   | TTTTCACTCAAAGGGCGAAAAACCATCACCTTTCTTCATTA          | 2 |
| 21[56]23[63]   | AGCTGATTGCCCTTCAGAGTCCACTATTAAGGGTGCCGTTTTCTTCATTA | 2 |
| 21[96]23[95]   | AGCAAGCGTAGGGTTGAGTGTTGTAGGGAGCCTTTCTTCATTA        | 2 |
| 21[120]23[127] | CCCAGCAGGCGAAAAATCCCTTATAAATCAAGCCGGGCTTTCTTCATTA  | 2 |
| 21[160]22[144] | TCAATATCGAACCTCAAATATCAATTCCGAAATTTCTTCATTA        | 2 |
| 23[256]22[272] | CTTTAATGCGGAACTGATAGCCCCACCAGTTTCTTCATTA           | 2 |
| 0[47]1[31]     | AGAAAGGAACAATAAAGGAATTCAAAAAATATGAATCTA            | 3 |
| 2[271]0[272]   | GTTTTAACTTAGTACCGCCACCCAGGCCATTATGAATCTA           | 3 |
| 3[32]5[31]     | AATACGTTTGAAAGAGGACAGACTGACCTTTTATGAATCTA          | 3 |
| 6[143]5[159]   | GATGGTTGAAACGAGTAGTAAATTTACCATTATATGAATCTA         | 3 |
| 6[271]4[272]   | ACCGATTGTCGGCATTTCGGTCATAATCATATGAATCTA            | 3 |
| 7[32]9[31]     | TTTAGGACAAATGCTTTAAACAATCAGGTCTTATGAATCTA          | 3 |
| 10[143]9[159]  | CCAACAGGAGCGAACCCAGACCGGAGCCTTACTTATGAATCTA        | 3 |
| 10[271]8[272]  | ACGCTAACACCCACAAGAATTGAAAATAGCTTATGAATCTA          | 3 |
| 11[32]13[31]   | AACAGTTTGTACCAAAAACATTTTATTTCTTATGAATCTA           | 3 |
| 14[143]13[159] | CAACCGTTTCAAATCACCATCAATTCGAGCCATTATGAATCTA        | 3 |
| 14[271]12[272] | TTAGTATCACAATAGATAAGTCCACGAGCATTATGAATCTA          | 3 |
| 15[32]17[31]   | TAATCAGCGGATTGACCGTAATCGTAACCGTTATGAATCTA          | 3 |
| 18[143]17[159] | CAACTGTTGCGCCATTCGCCATTCAAACATCATATGAATCTA         | 3 |
| 18[271]16[272] | CTTTTACAAAATCGTCGCTATTAGCGATAGTTATGAATCTA          | 3 |





GAATATGATGATAAATCCGCTCCTTCTGGTGGTTTCTTTGTTCCGCAAATGATAATGTTACTCAAACCTTTTAAAATTAATAACGTTCCGGCAAAGGATTTAATACGAG  
 TTGTGCAATTGTTGTAAAGTCTAATACTTCTAAATCCTCAAATGTATTATCTATTGACGGCTCTAATCTATTAGTTGTAGTGCTCCTAAAGATATTTAGATAACCT  
 TCCTCAATTCCTTCAACTGTTGATTTGCCAACTGACCAGATATTGATTGAGGGTTTGATATTTGAGGTTACAGCAAGGTGATGCTTTAGATTTTCATTTGCTGCTGGC  
 TCTCAGCGTGGCACTGTTGCAGGCGGTGTAATACTGACCGCCTCACCTCTGTTTATCTTCTGCTGGTGGTTCGTTCCGGTATTTTAAATGGCGATGTTTAGGGCTAT  
 CAGTTCGCGCATTAAGACTAATAGCCATTCAAAAATATTGCTGTGCCACGTATTCTTACGCTTTCAGGTCAGAAGGGTTCTATCTCTGTTGGCCAGAATGTCCCTTT  
 TATTACTGGTGGTGTGACTGGTGAATCTGCCAATGTAATAATCCATTTCAGACGATTGAGCGTCAAATGTAGGTATTTCCATGAGCGTTTTTCTGTTGCAATGGCT  
 GCGGGTAATATTGTTCTGGATATTACCAGCAAGGCCGATAGTTG

**Table S8 | DNA-PAINT docking and imager sequences and biotin docking sequence**

| Description                                              | Sequence                       |
|----------------------------------------------------------|--------------------------------|
| Imager P1*                                               | 5' -CTAGATGTAT-dye             |
| Imager P2*                                               | 5' -TATGTAGATC-dye             |
| Imager P3*                                               | 5' -GTAATGAAGA-dye             |
| Imager P4*                                               | 5' -GTAGATTCAT-dye             |
| Imager P5*                                               | 5' -CTTTACCTAA-dye             |
| Imager P6*                                               | 5' -GTAATCAATT-dye             |
| Imager P7*                                               | 5' -CATCCTAATT-dye             |
| Imager P8*                                               | 5' -GATCCATTAT-dye             |
| Imager P9*                                               | 5' -CACCTTATTA-dye             |
| Imager P10*                                              | 5' -CCTTCTCTAT-dye             |
| Imager P11*                                              | 5' -GTATCATCAA-dye             |
| Imager P12*                                              | 5' -GAATCACTAT-dye             |
| 9nt P1 docking site                                      | Strand-TTATACATCTA-3'          |
| 9nt P2 docking site                                      | Strand-TTATCTACATA-3'          |
| 10nt P2 docking site                                     | Strand-TTGATCTACATA-3'         |
| 9nt P3 docking site                                      | Strand-TTTCTTCATTA-3'          |
| 9nt P4 docking site                                      | Strand-TTATGAATCTA-3'          |
| 9nt P5 docking site                                      | Strand-TTTTAGGTAAA-3'          |
| 9nt P6 docking site                                      | Strand-TTAATTGAGTA-3'          |
| 9nt P7 docking site                                      | Strand-TTAATTAGGAT-3'          |
| 9nt P8 docking site                                      | Strand-TTATAATGGAT-3'          |
| 9nt P9 docking site                                      | Strand-TTTAATAAGGT-3'          |
| 9nt P10 docking site                                     | Strand-TTATAGAGAAG-3'          |
| 9nt P11 docking site                                     | Strand-TTTTGATGATA-3'          |
| 9nt P12 docking site                                     | Strand-TTATAGTGATT-3'          |
| Biotinylated P1 docking site for antibody coupling       | Biotin-TTATACATCTA-3'          |
| Biotinylated P2 docking site for antibody coupling       | Biotin-TTATCTACATA-3'          |
| Biotinylated P3 docking site for antibody coupling       | Biotin-TTTCTTCATTA-3'          |
| Biotinylated P4 docking site for antibody coupling       | Biotin-TTATGAATCTA-3'          |
| Biotinylated docking site for microtubule-like structure | Biotin-GAATCGGTACAGTACAACCG-3' |

## Supplementary Protocol | Flow chamber protocol for Exchange-PAINT imaging

PDMS flow chamber volume: 40  $\mu$ l

- Rinse flow chamber with 100  $\mu$ l 1 M KOH
- Rinse flow chamber with 100  $\mu$ l buffer A twice
- Incubate for 5 min
- Rinse flow chamber with 100  $\mu$ l buffer A
- Rinse flow chamber with 50  $\mu$ l 1mg/ml BSA-Biotin in buffer A
- Incubate for 2 min
- Rinse flow chamber with 50  $\mu$ l 1mg/ml BSA-Biotin in buffer A
- Incubate for 2 min
- Rinse flow chamber with 100  $\mu$ l buffer A twice
- Rinse flow chamber with 50  $\mu$ l 0.5 mg/ml Streptavidin in buffer A
- Incubate for 2 min
- Rinse flow chamber with 50  $\mu$ l 0.5 mg/ml Streptavidin in buffer A
- Incubate for 2 min
- Rinse flow chamber with 100  $\mu$ l buffer A twice
- Rinse flow chamber with 100  $\mu$ l buffer B twice
- Incubate for 30 min
- Rinse flow chamber with 100  $\mu$ l buffer B twice
- Rinse flow chamber with 50  $\mu$ l 1nM origami in buffer B
- Incubate for 10 min
- Rinse flow chamber with 100  $\mu$ l buffer B twice
- Attach tubing
- Operate in buffer B
